1 **Plant-associated microbiomes promote nutrient turnover**  
2 **in impoverished substrates of a biodiversity hotspot**

3 **Authors**

4 Antonio P. Camargo<sup>1,2,3</sup>, Rafael Soares Correa de Souza<sup>1,3,\*</sup>, Juliana Jose<sup>2</sup>, Isabel R.  
5 Gerhardt<sup>1,3,4</sup>, Ricardo A. Dante<sup>1,3,4</sup>, Supratim Mukherjee<sup>5</sup>, Marcel Huntemann<sup>5</sup>, Nikos C.  
6 Kyrpides<sup>5</sup>, Marcelo F. Carazzolle<sup>2</sup>, Paulo Arruda<sup>1,2,3,\*</sup>

7 **Affiliations**

8 <sup>1</sup>Centro de Biologia Molecular e Engenharia Genética, Universidade Estadual de Campinas  
9 (UNICAMP), 13083-875, Campinas, SP, Brazil. <sup>2</sup>Departamento de Genética e Evolução,  
10 Instituto de Biologia, Universidade Estadual de Campinas (UNICAMP), 13083-970,  
11 Campinas, SP, Brazil. <sup>3</sup>Genomics for Climate Change Research Center (GCCRC),  
12 Universidade Estadual de Campinas (UNICAMP), 13083-875, Campinas, SP, Brazil.  
13 <sup>4</sup>Embrapa Informática Agropecuária, 13083-886, Campinas, SP, Brazil. <sup>5</sup>US Department of  
14 Energy Joint Genome Institute, Lawrence Berkeley National Laboratory, Berkeley, CA, USA

15 \*Corresponding author: [scs.rafael@gmail.com](mailto:scs.rafael@gmail.com); [parruda@unicamp.br](mailto:parruda@unicamp.br)

## 1 **Abstract**

2 The substrates of the Brazilian *campos rupestres* have extremely low concentrations of key  
3 nutrients, mainly phosphorus, imposing severe restrictions to plant growth. Regardless, this  
4 ecosystem harbors enormous biodiversity which raises the question of how nutrients are  
5 cycled and acquired by the biosphere. To uncover the nutrient turnover potential of plant-  
6 associated microorganisms in the *campos rupestres*, we investigated the compositions and  
7 functions of microbiomes associated with two species of the Velloziaceae family that grow  
8 over distinct substrates (soil and rock). Amplicon, metagenomic, and metagenome-  
9 assembled genome sequence data showed that the *campos rupestres* harbor a novel  
10 assemblage of plant-associated prokaryotes and fungi. Compositional analysis revealed  
11 that the plant-associated soil and rock communities differed in taxonomic structure but  
12 shared a core of highly efficient colonizers that were strongly coupled with nutrient  
13 mobilization. Investigation of functional and abundance data revealed that the plant hosts  
14 actively recruit communities by exuding organic compounds and that the root-associated  
15 microbiomes possess a diverse repertoire of phosphorus turnover mechanisms. We also  
16 showed that the microbiomes of both plant species encompass novel populations capable  
17 of mobilizing nitrogen and that the substrate strongly influences the dynamics of this cycle.  
18 Our results show that the interplay between plants and their microbiomes shapes nutrient  
19 turnover in the *campos rupestres*. We highlight that investigation of microbial diversity is  
20 fundamental to understand plant fitness in stressful environments.

21

## 1 **Background**

2 The Brazilian *campos rupestres* constitute a grassland ecoregion located on the geologically  
3 old rocky outcrops of the central and eastern regions of Brazil (Figure 1A, left). *Campos*  
4 *rupestres* soils are shallow, acidic, and severely nutrient-impoverished, especially low in  
5 phosphorus (P), imposing a high cost for nutrient acquisition to resident plants [1].  
6 Nevertheless, despite this abiotic constraint, the *campos rupestres* constitute a biodiversity  
7 hotspot with an average species density among the world's highest, harboring thousands of  
8 endemic vascular plant species from highly specialized and phylogenetically clustered  
9 lineages [2,3].

10 Plant adaptations to the nutritional scarcity of the *campos rupestres* substrates have been  
11 extensively studied. Members of the highly successful Velloziaceae family have been shown  
12 to use multiple strategies to cope with nutrient limitation, such as the formation of durable  
13 and well-defended structures [4], the efficient remobilization of P from senescent leaves,  
14 and the development of specialized radicular systems that enhance nutrient uptake via the  
15 secretion of carboxylates [5–7]. As a result of the plant-centric approach that has dominated  
16 the study of the *campos rupestres* nutritional dynamics, it remains obscure how plant growth  
17 is influenced by interactions with microorganisms.

18 Plant microbiomes play a fundamental role in shaping the host responses to biotic and  
19 abiotic stresses and modulating plant phenotypic plasticity. These microorganisms can form  
20 complex and stable associations that can determine plant speciation, geographic distribution  
21 patterns, and diversity to a much stronger degree than previously acknowledged [8]. This  
22 scenario implies that plants cannot be perceived as isolated entities but rather as a unit  
23 formed by the host and its associated microbiome [9]. Such tight interactions indicate that  
24 these microbial communities are not random assemblages of microorganisms, and that  
25 intricate inter-species relationships shape the microbiome composition. This molecular

1 interplay between the plant and its microbiome has dramatically shaped the genome of root-  
2 associated bacteria [10], providing further evidence of the evolutionary interdependence of  
3 the host-microbiome system.

4 Microbiome-driven processes involved in nutrient acquisition are thought to have a decisive  
5 influence in naturally stressful environments, where plants are inclined to be more  
6 dependent on microbial communities for nutrient uptake than in nutrient-rich habitats, where  
7 resources are readily available [11]. In grasslands and savannahs, for example, nitrogen-  
8 fixing bacteria and mycorrhizal association contribute up to 20% of total nitrogen acquired  
9 by the vegetation [12]. In boreal forests, where nutrient availability is severely affected by  
10 low temperatures and soil pH, plant-associated microbiomes were estimated to be  
11 responsible for most of the nitrogen and phosphorus acquired by plants [13,14].

12 Previous reports showing that most *campos rupestres* plants growing under P-limited  
13 substrates do not associate with mycorrhizal fungi [15] have strengthened the belief that  
14 these plants rely solely on their own adaptations to acquire phosphorus. However, a high-  
15 throughput assessment of the diversity and functions of plant-associated microorganisms  
16 has never been conducted in the *campos rupestres*, hindering any attempts to perform a  
17 comprehensive evaluation of how microbial communities influence the acquisition and  
18 turnover of nutrients in this environment.

19 Here, we aimed to uncover the diversity and functional roles of microbial communities  
20 associated with two species of Velloziaceae growing in two distinct nutrient-impooverished  
21 substrates: *Vellozia epidendroides* Mart. ex Schult. & Schult. f. and *Barbacenia macrantha*  
22 Lem, which are found growing in shallow soil patches (Figure 1A, center) and over rocks  
23 (Figure 1A, right), respectively. We characterized the microbiomes associated with roots,  
24 stems, and leaves of these two species, and their soil or rock substrates, and showed that



1 novel and diverse communities associate closely with their hosts and are involved in  
2 phosphorus and nitrogen turnover and plant nutrition.

### 3 **Results**

#### 4 Taxonomic and functional landscapes of Velloziaceae-associated microbiomes

5 Prokaryotic and fungal communities associated with *V. epidendroides* and *B. macrantha*  
6 were assessed through amplicon sequencing of the 16S gene and ITS2 region, respectively.  
7 From the substrate and plant organ samples we identified 29,008 16S and 9,153 ITS unique  
8 amplicon sequence variants (ASVs), which were assigned to three archaeal, 38 bacterial  
9 (Figure 1B), and 13 fungal (Suppl. Figure 1A) phyla. In addition to the amplicon datasets,  
10 sequence data from 16 metagenomes, comprising 25.8 Gbp, were assembled from soil-,  
11 rock-, and root-associated samples (Suppl. Table 1). From these assemblies, 522  
12 metagenome-assembled genomes (MAGs) were recovered and assigned to one archaeal  
13 and 17 bacterial phyla (Figure 1C, Suppl. Table 2). Further clustering based on average  
14 nucleotide identity (ANI) [16] revealed 331 species-level clusters ( $\geq 95\%$  ANI). The  
15 metagenomes recovered 16.3% to 42.4% of the total sequence diversity across different  
16 samples, while MAGs recovered from 10.8% to 39.1%. Additionally, most unassembled  
17 sequences were from populations closely related to those present in the metagenomes;  
18 sequence complexity was the main factor hindering metagenomic assembly (Suppl. Note 1,  
19 Suppl. Table 3).

20 To improve the recovery of the protein sequence space encompassed by these  
21 microbiomes, we performed protein-level assembly directly from sequence reads [17].  
22 Clustering these peptides with the complete set of proteins predicted from the metagenomes  
23 at multiple sequence identity levels (Suppl. Table 4) revealed that the *V. epidendroides*- and

1 *B. macrantha*-associated microbial communities harbored diverse genic repertoires with  
2 over 49 million unique proteins and six million clusters (at 50% identity).

### 3 Taxonomic and functional novelty of *campos rupestres* microbiomes

4 Taxonomy could not be assigned at the family level to 46.5% of 16S and 77.5% of ITS ASVs  
5 and at the phylum level to 25.8% of 16S and 48.7% of ITS ASVs (Figure 1B, Suppl. Figure  
6 1A). To quantify the community-level taxonomic novelty we devised the weighted average  
7 community identity (WACI) metric, which represents the abundance-weighted average  
8 identity of alignments between ASVs and their best matches in a reference database.  
9 Bacterial communities exhibited WACI around 91.8% to 95.8% (10th and 90th percentiles,  
10 Figure 1D), suggesting that they are dominated by novel genera and families (median within-  
11 rank identity of 96.4% and 92.3%, respectively [18]). There were no significant differences  
12 between the WACI of below-ground (substrate and root) and above-ground (stem and leaf)  
13 bacterial communities. However, below-ground fungal communities were significantly more  
14 novel in both plants (Suppl. Figure 1B, LMM  $p$ -value < 0.05; *V. epidendroides*  $\omega^2 \approx 0.64$ ; *B.*  
15 *macrantha*  $\omega^2 \approx 0.55$ ) and had lower WACI (median: 87.3% in *V. epidendroides* and 90.8%  
16 in *B. macrantha*).

17 Phylogenetic novelty was measured by computing the phylogenetic gain (PG; defined as  
18 the total branch length added by a set of genomes to a clade) brought by the MAGs to their  
19 lineages (Figure 1E). Out of the 522 genomes, 268 (51.3%) belonged to novel genera, 66  
20 (12.6%) belonged to new families, and 19 (3.6%) were assigned to new orders. These data  
21 contributed a substantial amount of phylogenetic novelty to known taxa (Suppl. Table 5),  
22 including some understudied phyla such as the Eremiobacterota, Dormibacterota, and  
23 Binatota, that were significantly expanded (PG: 40.4%, 13.9%, and 11.7%). Surprisingly, a  
24 substantial amount of phylogenetic diversity was added to Acidobacteriota (PG: 8.6%), a

1 phylum consistently found among abundant taxa in soils across the world [19–21]. We also  
2 found that the Elsterales, an order within the Proteobacteria that was previously found to be  
3 highly enriched in P limited soils [22], was greatly expanded (PG: 76.3%).

4 The functional uniqueness of the metagenomes was appraised by comparing their clustered  
5 protein repertoires to known protein families (Pfam, TIGRFAM, or KO). Around 72.3% of the  
6 non-singleton protein clusters (sequence identity  $\geq 90\%$ ) contained at least one member  
7 assigned to a known family. This proportion decreased to 50.1% in clusters comprising more  
8 distantly related proteins (sequence identity  $\geq 50\%$ ) (Suppl. Table 6). Additionally, functional  
9 novelty was quantified in an annotation-independent manner by comparing MAGs to closely  
10 related genomes to infer groups of orthologous genes (orthogroups) that were exclusive to  
11 the *campos rupestres* genomes at the family level. Around 563 exclusive orthogroups  
12 (comprising 4,829 genes) were found in 310 MAGs belonging to 44 families. The distribution  
13 of these orthogroups across the entire Bacteria domain revealed that 148 orthogroups (988  
14 genes) could not be found in any other genome and likely represented lineage-specific  
15 protein families (Suppl. Note 2, Suppl. Figure 2, Suppl. Table 7).

#### 16 Comparison of the *V. epidendroides* and *B. macrantha*-associated communities

17 Assessment of 16S ASV data of *V. epidendroides* and *B. macrantha* microbiomes revealed  
18 that the average alpha diversity (Pielou's equitability index [23] and richness) did not  
19 significantly differ between the prokaryotic communities associated with the two plants when  
20 discounting the effects of each tissue (Suppl. Figure 3A, B). Conversely, *V. epidendroides*-  
21 associated fungal communities exhibited significantly higher alpha diversity according to  
22 both estimates (LMM  $p$ -value  $< 0.05$ ; richness  $\omega^2 \approx 0.39$ ; equitability  $\omega^2 \approx 0.3$ ).

23 Comparisons of community structure showed that the microbiomes associated with *V.*  
24 *epidendroides* and *B. macrantha* significantly differed (Figure 2A, Suppl. Figure 3C, D;

1 PERMANOVA  $p$ -value  $< 0.001$ ). Indeed, most 16S and ITS ASVs were exclusive to one or  
2 the other plant in all sample types (Figure 2B, Suppl. Figure 3E). The differences in 16S  
3 ASV abundances between the two plant-associated communities revealed that several  
4 families were significantly enriched in the microbiomes of one of the plants (Figure 2C),  
5 indicating that the differentiation was taxonomically structured. Remarkably, several  
6 Actinobacteriota families were exclusively enriched in *B. macrantha*. This structured  
7 differentiation was also verified in the MAGs, as phylogenetic proximity was significantly  
8 correlated with abundance profile similarity (Mantel test  $p$ -value  $< 0.001$ , Figure 1C).

9 Divergence in expression of the genetic repertoires of the microbiomes of the two plants  
10 was verified by assessing protein cluster abundances in each sample (Suppl. Figure 3F, G).  
11 Accordingly, 17.8% of the gene clusters had significantly different measures for average  
12 number of copies per genome (absolute log<sub>2</sub> fold change  $\geq 0.5$  and  $s$ -value  $< 0.005$ ) and  
13 several KEGG modules and pathways were significantly enriched in one or the other plant  
14 (116 and 95 modules, 149 and 95 pathways in *V. epidendroides* and *B. macrantha*,  
15 respectively).

16 Considering that both plant species cope with multiple environmental stresses, we inquired  
17 whether they shared any microbial taxa. Despite the extensive compositional differentiation,  
18 *V. epidendroides* and *B. macrantha* shared a fraction of both 16S (12% to 25%, Figure 3A)  
19 and ITS (4.2% to 25.3%, Suppl. Figure 3H) ASVs. Interestingly, the shared microorganisms  
20 tended to have higher average abundances across most tissues, often comprising more  
21 than half of the total community abundance. Additionally, several bacterial families were  
22 enriched within the shared 16S ASV sets, suggesting that some lineages had a core  
23 microbiome that could efficiently colonize both plants (Figure 3B).

24 To determine whether shared bacterial species exhibited extensive genetic divergence  
25 between populations on each host plant, we selected MAGs that were highly abundant in

1 both plants and evaluated differences in allele frequencies, nucleotide diversity, and linkage  
2 disequilibrium. We found multiple hallmarks of populational divergence that seemed to be  
3 tied to the genome taxonomy and that were likely shaped by non-neutral evolutionary  
4 processes [24] ([Suppl. Note 3](#), [Suppl. Figure 4](#)).

#### 5 Evaluation of microbiome recruitment by the hosts and the microbial carbon cycling

6 Plants recruit beneficial microorganisms dynamically and selectively using root exudates  
7 rich in organic compounds such as amino acids and organic acids [21,25,26]. To investigate  
8 whether *V. epidendroides* and *B. macrantha* actively shape their microbiomes, the  
9 abundances of genes encoding organic substrate transporters ([Suppl. Table 8](#)) were  
10 estimated across all substrate and rhizosphere metagenomes. We found that the  
11 abundances of the evaluated transporters was systematically higher in the rhizosphere  
12 communities ([Figure 4](#), LMM  $p$ -value < 0.001;  $\omega^2 \approx 0.14$ ). Transporter enrichment in the  
13 rhizosphere occurred for all organic substrates that were evaluated ([Suppl. Table 9](#)),  
14 suggesting that multiple molecules may be involved in the recruitment process. Although the  
15 two plant species did not significantly differ in total transporter abundance they exhibited  
16 differing taxonomic profiles ([Suppl. Figure 5A](#)).

17 Because the soil substrate contains higher organic matter content than the exposed rocks  
18 [27], we investigated the carbon cycling potential of the *V. epidendroides* and *B. macrantha*  
19 microbiomes with respect to carbohydrate degradation and carbon dioxide fixation ([Suppl.](#)  
20 [Note 4](#), [Suppl. Figure 5](#), [Suppl. Tables 10 and 11](#)). We found that genes associated with  
21 carbohydrate turnover were more abundant in the *B. macrantha*-associated communities  
22 ([Suppl. Figure 5D](#)). On the other hand, the microbiomes of both plants exhibited potential  
23 for autotrophy, likely through different mechanisms for energy generation as photosynthetic  
24 bacteria were much more abundant in the rock dwelling communities ([Suppl. Figure 5E, F](#)).

1 Through metabolic potential inference we identified 38 autotrophic MAGs belonging to  
2 diverse lineages, including new families ([Suppl. Table 11](#)).

### 3 Investigation of the P turnover potential by Velloziaceae-associated microbiomes

4 Microorganisms encode diverse mechanisms for P mobilization [28], and as their biomass  
5 turns over through time, P becomes available to plants [29] ([Figure 5A](#)). To investigate the  
6 P turnover potential of the *V. epidendroides* and *B. macrantha* microbiomes, we measured  
7 the total abundance of genes involved in environmental P mobilization ([Suppl. Table 12](#)).  
8 Multiple processes were highly represented in the metagenomes of both plants ([Figure 5B](#))  
9 and were carried out by diverse taxa ([Suppl. Figure 6A](#)). Interestingly, some abundant P  
10 mobilization processes, such as the exopolyphosphatase activity and the catabolism of  
11 phosphanates, are not used by plants to increase P uptake, indicating a complementarity  
12 between repertoires of the hosts and their microbiome ([Figure 5A](#)). Additionally, a systematic  
13 increase in the abundances of P turnover processes in the rhizospheres relative to their  
14 adjacent substrates was verified ([Figure 5B](#), LMM  $p$ -value < 0.001;  $\omega^2 \approx 0.12$ ).

15 Despite extensive microbiome specialization in the two plants, 12 out of 15 families with the  
16 highest total abundances of genes involved in P turnover were found to be significantly  
17 enriched in their shared microbiome fraction ([Table 1](#), [Figure 3B](#)), indicating that the  
18 microbiome shared between these two plants played an important part in P nutrition. We  
19 also verified that different taxa might contribute to P mobilization using distinct mechanisms.  
20 For example, the Bryobacteraceae exhibited a high abundance of the *gcd* gene, involved in  
21 the synthesis of gluconic acid, a molecule that solubilizes P by chelating cations that are  
22 bound to recalcitrant phosphate [28,30]. In contrast, the UBA5184 had high abundances of  
23 genes encoding exopolyphosphatase [31] and inorganic pyrophosphatase [32], enzymes  
24 that release P from inorganic phosphate polymers. Interestingly, many of the families with

1 the highest P turnover potential had high PG, indicating that the novel lineages found in the  
2 *campos rupestres* play a part in P mobilization.

3 We compared the MAGs to genomes from GTDB r89 to evaluate whether they displayed  
4 trends regarding the number of genes involved in P turnover processes. Phylogenetic  
5 regression models revealed that multiple processes were significantly enriched in the  
6 *campos rupestres* MAGs, including two types of phosphate transporters (the PiT and the  
7 ABC transporter families), inorganic pyrophosphatases and exopolyphosphatases ([Figure](#)  
8 [5C](#)). Interestingly, the MAGs showed a significant reduction in the number of genes involved  
9 in the transport of sn-glycerol-3-phosphate and in the hydrolysis of phytate, indicating that  
10 these compounds might not be reliable sources of P in the *campos rupestres*.

11 Siderophores, synthesized by biosynthetic gene clusters (BGCs) and primarily used to  
12 scavenge iron [33,34], also take part in P turnover by releasing P bound to iron cations. The  
13 assembled metagenomes had 42 siderophore-producing BGCs, which were grouped  
14 according to their domain organization and sequence similarity into 15 gene cluster families  
15 (GCFs) ([Figure 6](#)). We found that a large gene cluster clan (GCC) — encompassing three  
16 GCFs and 18 siderophore BGCs (blue labels in [Figure 6](#)) and assigned to the  
17 Pseudonocardiaceae family — possessed domains similar to those of desferrioxamine  
18 siderophores [35,36]. However this GCC had distinctive domain organization and in tandem  
19 duplication of the siderophore biosynthesis protein (lucA/lucC family), suggesting significant  
20 structural differences between their final products and described desferrioxamines. All  
21 siderophores within the Pseudonocardiaceae GCC were comparatively much more  
22 abundant in *B. macrantha* root and rock communities, which was supported by 16S data  
23 ([Suppl. Figure 6B](#)), and similar abundance profiles were observed across most of the other  
24 siderophore BGCs. This difference in the siderophore synthesis potential was further  
25 supported by the fact that the “Biosynthesis of siderophore group nonribosomal peptides”

1 KEGG pathway was significantly enriched in the *B. macrantha*-associated communities  
2 (FDR < 0.001).

3 Although arbuscular mycorrhiza are well known to increase P uptake by roots [37],  
4 Velloziaceae growing on severely P-impooverished substrates exhibit extremely reduced  
5 colonization by mycorrhizal fungi [7,15,38]. However, the ITS data showed that both plants  
6 harbored diverse endophytic fungi root communities (Suppl. Figure 3A, B), which compelled  
7 us to interrogate whether the fungi associated with *V. epidendroides* and *B. macrantha*  
8 participate in P nutrition. Using a read-level targeted gene finding approach, we surveyed  
9 the metagenomic data to identify orthologs of the fungal high-affinity H<sup>+</sup>:Pi transporter  
10 (*PHO84*), which participates in both P uptake from the substrate and phosphate efflux to the  
11 plant in the symbiotic interface [39], which, in at least one case, is required for the  
12 establishment of endosymbiosis [40]. In total, 312 fungal *PHO84* were retrieved, 67.6% of  
13 which were assigned to taxa containing known endophytes, such as the Dothideomycetes,  
14 Sordariomycetes, Leotiomycetes, Agaricomycotina, and Glomeromycetes [41–44]. Analysis  
15 of their combined abundance revealed that, as expected for symbiotic fungi, *PHO84* was  
16 enriched in the rhizospheres relative to the adjacent substrates, albeit with low statistical  
17 significance (Suppl. Figure 6C, LMM p-value ≈ 0.18,  $\omega^2 \approx 0.1$ ).

18 Reconstruction of the N cycle dynamics in the *V. epidendroides* and *B. macrantha*

19 microbiomes

20 Bacteria and Archaea contribute to the nitrogen (N) cycle by participating in several steps  
21 such as the release of N from organic matter, N fixation into ammonia, nitrification, and  
22 denitrification (Figure 7A). To understand how microorganisms mediate N turnover in the  
23 *campos rupestres* and how they can impact plant nutrition, we evaluated the taxonomic  
24 profile and the abundances of genes involved in different steps of the nitrogen cycle (Suppl.  
25 Table 13). Several taxa possessed the genomic potential to mediate nitrogen



1 transformations ([Figure 7A](#), [Suppl. Figure 7A](#)). Abundances of genes involved in cycling N  
2 were slightly higher in the rhizospheres of *V. epidendroides* and *B. macrantha* in comparison  
3 to their adjacent substrates ([Figure 7B](#), LMM p-value  $\approx 0.06$ ,  $\omega^2 \approx 0.02$ ), suggesting that the  
4 potential to transform N is a feature of some root-recruited microorganisms.

5 We set out to further survey the N fixation profile of the *campos rupestres* communities by  
6 probing the metagenomes and MAGs for genes encoding subunits of the nitrogenase  
7 complex (*nifHDK*). Sequence-based taxonomic assignment of nitrogenase subunits and  
8 phylogenetic analysis of the dereplicated set of all *nifH* subunits revealed that most of the  
9 *nif* diversity comes from the Rhizobiales order (Proteobacteria phylum) and the  
10 Isosphaeraceae family (Planctomycetota phylum) ([Figure 7C](#), [Suppl. Figure 7B](#)). We also  
11 retrieved *nifH*-containing MAGs assigned to the Enterobacteriaceae family and  
12 Verrucomicrobiota phylum, the latter of which encoded a *nifH* from the group II clade, that  
13 was predominantly comprised of orthologs from obligate anaerobes [45].

14 Even though there is no report of an Isosphaeraceae-encoded *nif*, we found all subunits of  
15 the complex in four MAGs belonging to two species clusters, which persuaded us to  
16 reconstruct the evolutionary history of these orthologs. A phylogenetic analysis using *nifH*  
17 and *nifD* sequences from the Isosphaeraceae MAGs, other Planctomycetota species, and  
18 orthologs with high sequence similarity revealed that nitrogenase encoded by the MAGs  
19 formed a clade with Gammaproteobacteria, rather than Planctomycetota, strongly  
20 suggesting that they acquired *nifHDK* via horizontal gene transfer (HGT) ([Suppl. Figure 7C](#)).  
21 Indeed, we found clear synteny between a *nif*-containing Isosphaeraceae contig and the  
22 *Pseudomonas stutzeri* genome, which harbors a packed *nif* cluster [46]. Additionally, gene-  
23 level taxonomic assignment revealed clear boundaries between the genes vertically  
24 inherited from ancestral Isosphaeraceae and genes within the region received via HGT  
25 ([Suppl. Figure 7D](#)).

1 As for the Rhizobiales, the vast majority ( $\approx 91.5\%$ , or 54/59) of the orthologs prior to  
2 dereplication were found in unbinned contigs from *V. epidendroides* and soil metagenomes,  
3 resulting in an apparent major difference between the N fixation potential of the communities  
4 associated with the two plants. As the metagenomic data mostly captured free-living  
5 populations and because endophytic bacteria are major players in the N fixation process,  
6 we examined the abundances of *Bradyrhizobium* — a genus within the Rhizobiales that  
7 encompasses several endophytic diazotrophs — using 16S data and found that these  
8 bacteria were enriched in the endophytic compartments of both plants (Suppl. Figure 7E).  
9 To evaluate whether these endophytes can fix N, we used sensitive read-level gene  
10 identification to probe *Bradyrhizobium nifH* sequences in metagenomic data, which revealed  
11 that *nifH* assigned to *Bradyrhizobium* were present in the *B. machantha* and rock  
12 metagenomes, albeit in lower levels than in the *V. epidendroides*-associated communities,  
13 and that they were enriched in the rhizospheres (Suppl. Figure 7F, LMM  $p$ -value  $< 0.05$ ;  $\omega^2$   
14  $\approx 0.45$ ). We also identified two *Bradyrhizobium* contigs, retrieved from the metagenomes of  
15 both plants, that harbored proviral sequences containing the *exoZ* gene, which encodes a  
16 cell surface modifying acetylase that increases the efficiency of endosymbiosis  
17 establishment [47] (Suppl. Figure 7G). Comparison with IMG/VR's [48] viral genomes  
18 revealed that similar bacteriophages of the Myoviridae family were previously detected in  
19 root nodule and rhizosphere communities.

20 Besides the ammonia generated by N fixation, the primary source of inorganic nitrogen to  
21 plants is nitrate, which is produced through sequential oxidation of ammonia (Figure 7A).  
22 These reactions are carried out by ammonia-oxidizing Bacteria (AOB) and Archaea (AOA),  
23 which form nitrite in two steps (converting ammonia into hydroxylamine, and hydroxylamine  
24 into nitrite), and by nitrite-oxidizing bacteria, which convert nitrite into nitrate (Figure 7A).  
25 Inspection of the taxonomic assignments of contigs containing ammonia monooxygenase

1 (*amoABC*) and hydroxylamine oxidoreductase (*hao*) revealed that the Proteobacteria, which  
2 encompass all the traditional AOB [49], are a minor fraction of the nitrifying communities of  
3 the *campos rupestres* (Suppl. Figure 7A).

4 Canonically, both steps of nitrite formation are carried out by bacteria harboring both  
5 *amoABC* and *hao*; however, we found that the taxonomic profiles of these two enzymes  
6 were surprisingly contrasting, suggesting that these reactions might be performed by distinct  
7 populations (Suppl. Figure 7A). Inspection of the MAGs' gene repertoires supported this  
8 hypothesis, as no genome encoded both the *amo* complex and *hao* (Suppl. Figure 7H). Two  
9 groups of ammonia-oxidizing MAGs were retrieved: the Nitrososphaeraceae, a family of  
10 AOA that harbors *amoABC* and is known to oxidize hydroxylamine into nitrite without *hao*  
11 [50]; and the Binataceae, a family of the methylophilic phylum Binatota which encodes the  
12 methane monooxygenase cluster (*pmoABC*), a close ortholog of *amoABC* that has been  
13 shown to oxidize ammonia [51]. As for *hao*, we found highly abundant Isosphaeraceae  
14 MAGs encoding orthologs that contained all the 16 heme-binding cysteines necessary for  
15 function. Curiously, all the N-fixing Isosphaeraceae also contained *hao*, suggesting that  
16 these genomes fulfill a dual role in the nitrogen cycle. Furthermore, Isosphaeraceae  
17 genomes in GTDB r89 contained *hao*, indicating that ancestral lineages already participated  
18 in N turnover.

## 19 **Discussion**

20 Our data show that the microbiomes associated with the endemic *V. epidendroides* and *B.*  
21 *macrantha* are diverse and our results greatly expand the known diversity of several  
22 bacterial lineages. Notably, we provide evidence that these microorganisms are likely  
23 recruited by the plants and play a role in nutrient turnover, likely contributing to plant fitness.

1 The *campos rupestres* microbial communities harbor a high degree of taxonomic and  
2 function novelty

3 At high ranks, the taxonomic profiles of the *campos rupestres* microbiomes echoed that of  
4 global soil surveys for bacteria, archaea, and fungi [19–21], with communities dominated by  
5 phyla such as Proteobacteria, Acidobacteriota, Verrucomicrobiota, Ascomycota and  
6 Basidiomycota (Figure 1B, Suppl. Figure 1A). However, as the *campos rupestres* constitute  
7 an underexplored biodiversity hotspot with high levels of plant endemism, we evaluated the  
8 uniqueness of the communities associated with *V. epidendroides* and *B. macrantha* using  
9 multiple approaches and discovered extensive taxonomic and functional novelty.

10 Our data expanded the phylogenetic diversity of multiple understudied groups (Figure 1E),  
11 including the Eremiobacterota, that are involved in phosphorus turnover (Table 1) and  
12 carbon fixation (Suppl. Figure 5E, F), the Dormibacterota, also involved in carbon fixation  
13 (Suppl. Figure 5F), and the Binatota, a group of methylotrophic bacteria [52] that likely  
14 participates in nitrogen cycling in the *campos rupestres* soils (Figure 7D, Suppl. Figure 7A,  
15 H). Additionally, we found that the below-ground fungal communities were significantly more  
16 novel than those colonizing the stem and leaves.

17 Regarding the functional novelty, a drastic reduction of the fraction of annotated clusters  
18 was observed when proteins were grouped at 50% sequence identity, suggesting that the  
19 microbial communities of the *campos rupestres* harbor several small and lineage-specific  
20 gene families. This finding was further supported by comparative genomic analysis, which  
21 revealed hundreds of orthogroups that were exclusive to the genomes assembled in this  
22 work. We note, however, that because most of the existing bacterial diversity has not been  
23 sequenced the number of novel orthogroups is likely being overestimated.

1 The microbiomes of *V. epidendroides* and *B. macrantha* are highly differentiated but share  
2 a core of highly efficient colonizers

3 Even though the rocks over which *B. macrantha* grows are nutrient depleted as compared  
4 to the soils — especially regarding organic matter and nitrogen — we found that the  
5 prokaryotic diversity did not significantly differ between the microbiomes of the two plants,  
6 suggesting that the rock-dwelling microorganisms possess mechanisms that allow them to  
7 grow under severe limitations. Indeed, we found evidence that phosphorus and nitrogen  
8 turnover were not reduced in the rocks. In contrast, fungal communities associated with *B.*  
9 *macrantha* were less diverse than the ones associated with *V. epidendroides*, which is in  
10 accordance with previous reports that plants growing over rocks have reduced fungal  
11 colonization in the *campos rupestres* [7].

12 The different microbiomes of the two plants, despite their geographic proximity [27],  
13 suggests that contrasting substrates and host biology shape plant-associated communities  
14 in the *campos rupestres*. Furthermore, the finding that particular taxa become specialized  
15 on their host indicates that host and environment-specific pressures select specific  
16 functions. This is substantiated by the diverging genic repertoire of the *V. epidendroides* and  
17 *B. macrantha* microbiomes, with abundances of multiple metabolic pathways differing  
18 between them. One notable example of such structured differentiation is the recurrent  
19 enrichment of Actinobacteriota families in *B. macrantha*, which can be attributed to the  
20 resilience of these bacteria to low humidity [53] and greatly influenced the siderophore  
21 production in the rock-dwelling communities.

22 Despite microbiome specialization, the two plants shared a core microbiome of efficient  
23 microbial colonizers that were likely adapted to the harsh environmental conditions of the  
24 *campos rupestres*. Accordingly, several of the bacterial families enriched among the shared

1 ASVs ([Figure 3B](#)) were involved in phosphorus turnover, suggesting that these core taxa  
2 may increase plant fitness and were likely recruited by both plants.

3 The Velloziaceae microbiomes likely contribute to phosphorus availability and are recruited  
4 by root exudates

5 Species of the Velloziaceae family increase P availability in soils [15] and rocks [5] by  
6 secreting exudates containing carboxylates that release phosphate bound to cations, such  
7 as iron and aluminum [54]. Despite these adaptations, some forms of P are unavailable for  
8 plant uptake and are only accessed by bacteria, which harbor diverse processes that make  
9 P bioaccessible [28]. As root exudates are rich in organic compounds that recruit and sustain  
10 microbial communities [21], we hypothesized that Velloziaceae exudates fulfill a dual role:  
11 they increase the labile P concentration by direct solubilization and also recruit  
12 microorganisms that possess a complementary repertoire of molecular processes that  
13 increase P availability in the root's vicinity. In this scenario, microorganisms would use  
14 phosphate for their own needs, but would benefit the system in the long term by mobilizing  
15 P otherwise unavailable to plants [29] ([Figure 5A](#)).

16 We assessed active recruitment of microorganisms by evaluating the abundances of  
17 transporters with specificity for amino acids and organics acids that are secreted by roots  
18 [25,26]. The increased abundances of these transporters in the rhizosphere communities of  
19 both plants ([Figure 4](#)) suggests that microorganisms able to take up organic compounds  
20 were being selected in the vicinity of the roots, which is consistent with our hypothesis that  
21 Velloziaceae root exudates shape the plant microbiome. The enrichment of processes linked  
22 to P turnover in the root microbiomes compared to the substrates indicates that the recruited  
23 bacteria can increase bioaccessible P ([Figure 5B](#)). Furthermore, the fact that most of the  
24 taxa with elevated P turnover potential were enriched within the shared microbiome of *V.*  
25 *epidendroides* and *B. macrantha* ([Table 1](#)) suggests that both plants actively recruit a

1 common set of nutritionally relevant microorganisms. To illustrate this scenario, we show  
2 that the Bryobacteraceae, whose known members are acidophilic chemoheterotrophs that  
3 consume organic acids [55], were enriched within the shared microbiome, had high  
4 abundances of genes involved in P turnover, and had high abundances in rhizospheres  
5 ([Table 1](#)).

6 By evaluating the production of siderophores by plant-associated bacteria, we found that the  
7 examined communities harbored structurally diverse BGCs, including some that form hybrid  
8 regions with other classes of biosynthetic clusters ([Figure 6, rightmost column](#)), which  
9 suggests a diversified repertoire of final siderophore products. In addition, the siderophore  
10 repertoires of *B. macrantha*-associated communities were much larger, which could be  
11 interpreted as an indirect consequence of the higher abundance of the BGC-rich [56]  
12 Actinobacteriota in these microbiomes. We believe, however, that a complementary nutrient-  
13 driven explanation is also appropriate: as the iron content of the sampled rocks is around 8-  
14 fold lower than that of the soils [27] this nutrient is under increased demand in *B. macrantha*  
15 microbiomes, increasing the fitness of Actinobacteriota populations that are efficient at  
16 scavenging iron and, consequently, solubilizing phosphate.

17 Despite previous reports suggesting that Velloziaceae growing under severe P-  
18 impoverishment exhibit reduced fungi colonization [7,15,38], a diverse set of transporters  
19 were assigned to fungal taxa that comprise known endosymbiotic species and that were  
20 enriched in the rhizosphere ([Suppl. Figure 6C](#)). Given that the below-ground fungal  
21 communities under investigation included highly novel fungal lineages ([Suppl. Figure 1B](#)),  
22 we hypothesize that undescribed species may establish associations with the radicular  
23 systems of both plants, occupying the ecological niche left by arbuscular mycorrhiza whose  
24 abundances were extremely reduced in the *campos rupestres* (median Glomeromycota ASV

1 abundance in below-ground samples: 0.23% and 0.20% in *V. epidendroides* and *B.*  
2 *macranta*, respectively).

3 Nitrogen cycling is heavily influenced by the substrate and involves newly described  
4 microbial lineages and interaction dynamics

5 In the *campos rupestres*, nitrogen is constantly lost from the biological pool due to seasonal  
6 fires [1]. Therefore, as biological fixation of atmospheric N is likely pivotal to sustain the  
7 biomass of this ecosystem, we set out to investigate the N cycle in the context of the *V.*  
8 *epidendroides* and *B. macrantha*-associated communities. Our finding that N-transforming  
9 processes in the *campos rupestres* were carried out by several taxa challenges the  
10 traditional view that some reactions, such as ammonia and nitrite oxidation, are carried out  
11 by few restricted clades. Additionally, as we observed for genes involved in P-turnover, we  
12 found that N cycle processes were also enriched in the rhizosphere, although at a much  
13 lower level, suggesting that microorganisms that can perform some of the transformations  
14 in the N cycle have increased fitness when associated with plants, possibly due to active  
15 root recruitment.

16 We identified multiple Isosphaeraceae genomes with metabolic potential for nitrogen  
17 fixation. Although *nifHDK* genes have been documented in some marine Planctomycetota  
18 [57], their complexes belong to the group II *nif*, while the *campos rupestres* Isosphaeraceae  
19 orthologs belong to group I (Suppl. Figure 7B, C). A combination of approaches indicates  
20 that the N fixing potential of the Isosphaeraceae MAGs was most likely the result of a HGT  
21 from a Gammaproteobacteria (Suppl. Figure 7C, D). We also speculate that the  
22 Isosphaeraceae, as other Planctomycetota, display cell compartmentalization [58], which  
23 could be used to create an anaerobic environment for *nif* activity, as observed in  
24 Planctomycetota possessing anammoxosomes [59]. Given that these MAGs compose a  
25 large fraction of the *campos rupestres nifH* diversity (Figure 7C, Suppl. Figure 7B) and that



1 there is prior evidence for *nif* HGT events [46,60–62], we argue that horizontal transmission  
2 of the nitrogenase activity can affect the biogeochemical N cycle and, consequently, plant  
3 nutrition.

4 We also found a large amount of *nifH* orthologs that were assigned to the Rhizobiales order,  
5 a lineage that comprised several known diazotrophs. Interestingly, only a few of these  
6 orthologs were retrieved from *B. macrantha* and rock metagenomes and, although several  
7 *Bradyrhizobium* MAGs were recovered from these environments, none had the metabolic  
8 potential to fix N. We believe that the lack of *nif* is an advantageous trait for rock-dwelling  
9 bacteria, as the N fixation reaction is very carbon-demanding [63] and could cripple their  
10 growth in a carbon-poor environment [27]. We found, however, indirect evidence for  
11 endophytic diazotrophs as read-level gene identification revealed an enrichment of  
12 *Bradyrhizobium nifH* abundance in the rhizosphere of both plants (Suppl. Figure 7F). In  
13 addition, the finding that virus-encoded *exoZ* is integrated into *Bradyrhizobium* genomes  
14 (Suppl. Figure 7G) further supports that these bacteria establish endophytic associations,  
15 as phages employ auxiliary metabolic genes to enhance host fitness and boost their  
16 replication rates [64–66].

17 Regarding nitrification, we found no evidence for the participation of canonical AOB that  
18 possess the molecular machinery for the two-step ammonia conversion into nitrite within a  
19 single cell. Instead, we found that the ammonia and hydroxylamine oxidation reactions in  
20 the soil are likely carried out by distinct populations belonging to the Binataceae and  
21 Isosphaeraceae families, respectively. Even though *hao* has no other known function aside  
22 from hydroxylamine oxidation, *amoABC/pmoABC* can oxidize both ammonia and methane.  
23 In fact, some methylotrophs use *hao* as a hydroxylamine detoxification mechanism [51].  
24 However, several Binatota genomes (22 genomes in GTDB r89 and 86 genomes in GEM  
25 [67]) encode *hao*, even though some encode genes involved in denitrification [52], which

1 lead us to hypothesize that the methylotrophic Binataceae use metabolic handoff  
2 associations [68] with *hao*-encoding Isosphaeraceae as a means of hydroxylamine  
3 detoxification, benefiting the recipient cell by providing them with an energy-generating  
4 molecule.

5 As we investigated a broader genomic dataset, we found that the decoupling of the  
6 *amoABC-hao* system was commonplace, as approximately half (92 out of 193) of *hao*-  
7 containing bacterial genomes in GTDB (release 89, AnnoTree [69] annotation) have no  
8 subunit of the *amoABC* complex, including 16 Planctomycetota and 9 Acidobacteriota  
9 genomes (both phyla encoding *hao* in our metagenomes). Further strengthening our  
10 hypothesis, the alternative mechanism of hydroxylamine detoxification using the cytochrome  
11 P460 [70] was also absent in all Binatota MAGs and was found in 6 of 7 Isosphaeraceae  
12 genomes. We note, however, that even though hydroxylamine is known to be released from  
13 the cell to the environment [71,72], it is a very reactive molecule, being readily oxidized into  
14 nitrogen trace gases [73,74]. Therefore, close physical proximity is likely necessary for the  
15 metabolic handoff to be effective.

16 Altogether, our results suggest that most of the N fixation in *V. epidendroides* is performed  
17 by Isosphaeraceae and *Bradyrhizobium*, both free-living and endophytic. In *B. macrantha*,  
18 most fixation is likely performed by endophytic *Bradyrhizobium*, probably due to nutritional  
19 limitations of the substrate where this plant thrives (Figure 7D). The importance of  
20 *Bradyrhizobium* for plants is supported by the fact that its family (Xanthobacteriaceae) had  
21 the highest level of enrichment among the ASVs that were shared between the root  
22 communities (Figure 3B). As for nitrification, our MAG data suggest that ammonia oxidation  
23 is primarily conducted by Binataceae (in *V. epidendroides*) and by Nitrososphaeraceae (in  
24 *B. macrantha*), with a critical metabolic handoff interaction between Binataceae and  
25 Isosphaeraceae to convert hydroxylamine into nitrite (Figure 7D). Although many other taxa,

1 such as Acidobacteriota and Proteobacteria, also may be involved in these reactions, we  
2 found no evidence for the participation of canonical AOB.

### 3 **Conclusions**

4 This study set out to characterize the composition and functions of the microbiomes  
5 associated with two plant species that grow in the severely nutrient-impooverished substrates  
6 of the Brazilian *campos rupestres*. Our results indicate that microorganisms form close  
7 associations with their hosts and are involved in carbon, phosphorus, and nitrogen turnover.  
8 These findings highlight that plant-associated microorganisms contribute to plant nutrition  
9 and that assessing microbial diversity is crucial to understand the dynamics of nutrient  
10 cycling. We propose that future research of nutrient-limited environments considers the  
11 microbial diversity and ecology to develop holistic models of plant fitness.

### 12 **Methods**

#### 13 Sample collection and metagenomic sequencing

14 The study design, sampling methodology, library preparation, and sequencing that were  
15 used in this study were thoroughly detailed previously [27]. Briefly, substrate (soil and rock),  
16 root, stem and leaves were sample from six individuals of *V. epidendroides* and *B.*  
17 *macrantha* in March of 2017, at the end of the wet season. For each plant species, a  
18 sampling area of approximately 200 m<sup>2</sup> was defined and individuals with similar height,  
19 number of leaves, and number of tillers were selected and assigned random identifiers from  
20 R1 to R6. For *V. epidendroides*, the soil surrounding the plant within a 20 cm radius was  
21 excavated to a depth of 15 cm. For *B. macrantha*, the adjacent rocks were fragmented with  
22 a hammer and chisel until roots were exposed and the pieces of rock were collected and  
23 further grinded to small pieces. Host-associated microbiomes were gathered from the

1 external and internal compartments of the root, stem, and leaves of the sampled plants  
2 using methods adapted from a previously described protocol [75].

3 Environmental DNA was extracted using the PowerSoil DNA Isolation kit (MO BIO  
4 Laboratories, Inc., Carlsbad, CA, USA). Amplicon sequencing of the 16S rRNA gene (V4  
5 region) and the internal transcribed spacer 2 (ITS2), for profiling prokaryotic and fungal  
6 communities, was achieved through PCR amplification of the DNA extracted from all  
7 samples (substrates and the external and internal plant organs) using the 515FB/806R [76]  
8 and ITS9\_Fwd/ ITS4\_Rev [77] primer pairs and subsequent sequencing using the Illumina  
9 MiSeq platform to generate 2 × 300 bp reads. Metagenomic libraries of the external root and  
10 substrate communities from three individuals (samples R1 to R3) were generated with the  
11 Illumina HiSeq sequencing platform, yielding 2 × 150 bp reads. All library preparation and  
12 sequencing procedures were conducted at the DOE Joint Genome Institute.

### 13 Amplicon sequence variants inference and taxonomic assignment

14 Sequencing reads of 16S and ITS were processed to remove the PCR primer sequences  
15 with cutadapt [78] (version 1.16). We retained read pairs where complete sequences of both  
16 the forward primer in the R1 read and the reverse primer in the R2 read were detected.  
17 Amplicon sequence variants (ASV) inference was then performed separately for the 16S  
18 and ITS libraries using DADA2 [79] (version 1.6.0). For the 16S libraries, we used Phred  
19 score profiles of the R1 and R2 reads to determine the lengths that the reads should be  
20 truncated to so that bad-quality regions were removed (245 bp for R1 and 180bp for R2).  
21 ITS reads were not truncated to a fixed length to facilitate overlap between the read pairs as  
22 this region presents significant length variation across genomes. Next, reads with  
23 ambiguous bases or with an expected number of errors greater than two were filtered out  
24 and DADA2's error models were fitted to the R1 and R2 reads of both types of amplicon.  
25 These models and the dereplicated reads pooled from all samples were used as input for

1 the core 'dada' function, which infers sequencing errors and correct read sequences. Finally,  
2 ASVs were obtained by merging read pairs whose R1 and R2 had an overlapped of at least  
3 16 bp and by removing putative PCR chimeras.

4 Taxonomic assignment of ASVs was performed with the IDTAXA algorithm [80] (part of the  
5 DECIPHER library, version 2.8.1) using a minimum confidence threshold of 40% and the  
6 GTDB [81] (release 89) and UNITE [82] (Feb. 2020 release) databases as taxonomic  
7 references for 16S and ITS sequences, respectively. IDTAXA was also employed to identify  
8 ASVs derived from organellar genomes by assigning 16S sequences to taxa from the SILVA  
9 database [83] (release 138), which includes ribosomal genes of mitochondria and  
10 chloroplast. ASVs found to be derived from organellar genomes were excluded from  
11 downstream steps.

12 An additional filter was performed to remove likely spurious ASVs in an unsupervised  
13 manner, based on their recurrence across different samples [84]. We first computed the  
14 recurrence of each ASV as the number of samples in which it was observed at least once  
15 (that is, had at least one read associated to it) and then discarded ASVs with prevalence  
16 less than 2 were excluded from further analyses.

#### 17 Investigation and statistical analyses of ASV data

18 Community alpha diversity, quantified as both richness and evenness, was independently  
19 computed from 16S and ITS ASV count using the vegan library (version 2.5-5). Richness  
20 was estimated from count matrices rarified to 5,000 reads, a value that is close to the lowest  
21 sequencing depth among the samples. Community evenness was assessed through the  
22 Pielou's equitability index. To test for relationships between the host plant species and  
23 community alpha diversity, the data was modeled using linear mixed-effects models (LMMs)  
24 with the lmerTest package (version 3.1-0) as follows:  $Y = \beta \times H + S + C + E$ , where  $\beta$  is the

1 regression coefficient,  $H$  encodes the host species,  $S$  and  $C$  are the random effects of the  
2 sampled individual and the sample type, respectively, and  $E$  is a vector of errors. The sample  
3 types used for modeling were the external and internal communities of the root, stem, and  
4 leaves; substrate samples were not included.

5 Beta diversity was appraised using Bray–Curtis and weighted UniFrac dissimilarities  
6 computed from relative ASV abundances using the phyloseq library [85] (version 1.34.0).  
7 The phylogenetic trees used to compute weighted UniFrac were reconstructed using IQ-  
8 TREE [86] (version 2.0.3, parameters: '-fast -m GTR+G4') from 16S and ITS ASV  
9 alignments generated with MAFFT [87] (version 7.464, parameters: '--auto'). The statistical  
10 significance of grouping communities according to their host plant within the Bray–Curtis  
11 and UniFrac spaces was estimated using PERMANOVA ('adonis function from vegan) [88].

12 The differentiation of communities belonging to the same type (substrate and the  
13 external/internal communities of the root, stem, and leaves) but associated with different  
14 host plants was appraised using two approaches. First, the main taxa driving the  
15 differentiation between *V. epidendroides* and *B. macrantha*-associated communities were  
16 identified with ALDEx2 [89] (version 1.18.0) with the parameters: denom = "zero",  
17 mc.samples = 1000. The hypeR [90] library (version 1.6.0) was then used to identify  
18 statistically significant ( $FDR \leq 10^{-5}$  and score  $\geq 0.2$ ) family-level taxa enrichment in each  
19 host plant by performing Kolmogorov-Smirnov tests on ASV lists ranked by their estimated  
20 effect size. The second approach to quantify community differentiation was the  
21 determination of the relative amount of shared ASVs between pairs of communities. Shared  
22 ASVs were defined as ASVs that had prevalence  $\geq 2$  within the samples of both communities  
23 in pairwise comparisons. Family-level taxa enrichment in the shared ASV sets was detected  
24 using hypergeometric tests ( $FDR \leq 10^{-3}$ ), as implemented in hypeR.

1 To measure the taxonomic novelty of each community we devised the weighted average  
2 community identity (WACI) metric. Specifically, ASV sequences were aligned to reference  
3 databases (GTDB and UNITE for 16S and ITS sequences, respectively) using BLAST [91]  
4 (version 2.9.0) and community novelty was computed as the average ASV best hit alignment  
5 identity weighted by the relative ASV abundance in the sample. Differences between the  
6 WACI of below-ground (substrate and root-associated) and above-ground (stem and leaves-  
7 associated) communities were evaluated using LMMs as follows:  $Y = \beta \times R + S + C + E$ ,  
8 where  $\beta$  is the regression coefficient,  $R$  encodes the region (above or below ground),  $S$  and  
9  $C$  are the random effects of the sampled individual and the sample type, respectively, and  $E$   
10 is a vector of errors.

#### 11 Metagenome assembly and retrieval of metagenome-assembled genomes

12 Metagenome sequencing reads were quality-trimmed using cutadapt [78] (version 1.16) with  
13 the '--pair-filter=any -m 25 -q 5,5' parameters, discarding read pairs where at least one of  
14 the reads was shorter than 25 bp after the trimming. To recover unpaired reads that were  
15 discarded because their pairs did not satisfy the length threshold, cutadapt was executed  
16 again on these pairs using only the '-m 25' parameter. Both the trimmed read pairs and the  
17 unpaired reads were used for metagenomic assembly with using MEGAHIT [92] (version  
18 1.2.7) with the '--k-min 27 --k-max 147 --k-step 10' parameters. Additionally, four co-  
19 assemblies were generated by combining the reads from all samples of each sample type  
20 (soil, rock, and the rhizospheres of each plant) and assembling them together. Contigs  
21 shorter than 500 bp and 1,000 bp were filtered out from the individual and co-assemblies,  
22 respectively. Taxonomic assignment of the resulting contigs was attained with MAGpurify2  
23 (available at <https://github.com/apcamargo/magpurify2>), using a database based on GTDB  
24 release 89 (doi: 10.5281/zenodo.3817702). We also performed protein-level assembly with  
25 PLASS (version 2.c7e35) [17], taking the trimmed read pairs as input. Only peptides

1 containing both start and stop codons and with at least 60 amino acids were retained. This  
2 approach allowed us to recover a significant fraction of the protein sequence space that  
3 could not be attained by using the metagenomes alone ([Suppl. Table 4](#)).

4 Metagenome-assembled genomes (MAGs) were obtained by binning the contigs of each of  
5 the resulting assemblies and then dereplicating the bin sets recovered from assemblies of  
6 the same environment by clustering near-identical genomes. First, the coverage profile of  
7 contigs longer than 2 kb across all conditions was obtained using Bowtie 2 [93] (version  
8 2.3.5) to cross-map the reads of each sample to each assembly. Next, the read mappings  
9 were used to bin each assembly using four different binning algorithms: MetaBAT2 [94]  
10 (version 2.14), MaxBin2 [95] (version 2.2.7), CONCOCT [96] (version 1.1.0), and Vamb [97]  
11 (version 3.0.1). DAS Tool [98] (version 1.1.2) was then executed to aggregate the four sets  
12 of bins generated from each assembly into 16 non-redundant bin sets. To dereplicate near-  
13 identical genomic bins, Galah (version 0.1.0) was employed to cluster genomes with  $\geq 99\%$   
14 average nucleotide identity (ANI) across the four sets of bins generated from each sample  
15 type (three individual assemblies and one co-assembly) and select the best genome within  
16 each cluster based on completeness and contamination estimates obtained with CheckM  
17 [99] (version 1.1.3). Finally, MAGpurify2 was executed to remove putative contaminant  
18 contigs within each bin and the final set of bins (referred to as MAGs hereafter) was attained  
19 by discarding the bins that did not exhibit the minimum requirements to be classified as  
20 medium or high-quality MAGs according to the MIMAG standard [100]. We estimated MAG  
21 abundance using CoverM (version 0.3.2, available at <https://github.com/wwood/CoverM>) in  
22 genome mode (parameters: '--min-read-percent-identity 0.95 --methods mean').

### 23 Taxonomic assignment, species clustering and phylogenetic novelty of MAGs

24 MAGs were assigned taxonomic classifications using GTDB-Tk [101] (version 1.1.0), which  
25 uses 120 bacterial and 122 archaeal markers to place the genomes into reference bacterial



1 or archaeal phylogenies (GTDB release 89), depending on which marker set was  
2 predominant in the genome. In addition to the GTDB-based taxonomy, MAGs were also  
3 grouped into *de novo* taxonomy-independent species clusters using a greedy algorithm  
4 based on pairwise genome comparisons. Briefly, species clusters were iteratively  
5 constructed by grouping pairs of MAGs that aligned across at least 65% of the shorter  
6 genome length with at least 95% ANI [16,102,103], according to FastANI [16] (version 1.32)  
7 estimates. For each cluster, the highest scoring MAG (where the score was computed as  
8 ‘completeness – 5 × contamination’) was chosen as an operational species representative.

9 The amount of phylogenetic novelty brought by the *campos rupestres* MAGs to different  
10 bacterial and archaeal taxa at varying taxonomic ranks (phylum, class, order, family, and  
11 genus) was quantified using the phylogenetic gain metric [104], which stands for the added  
12 branch length from a subset of genomes within a phylogenetic clade. To measure this metric,  
13 the multiple sequence alignments of bacterial and archaeal markers generated by GTDB-  
14 Tk were used to reconstruct maximum-likelihood phylogenetic trees with IQ-TREE (version  
15 2.0.3), using the WAG+G substitution matrix and the fast-mode parameter (‘--fast’). The  
16 lengths of all branches and MAG-exclusive branches within each evaluated taxon were then  
17 measured with the DendroPy [105] library (version 4.4.0).

#### 18 Functional annotation and protein clustering

19 Functional annotation was achieved through the assignment of KO terms[106], Pfam  
20 families[107], and TIGRFAM families[108] to genes obtained from the metagenomic  
21 assemblies, PLASS’ protein-level assemblies, and MAGs. The genes derived from each of  
22 these three sources were annotated separately. Metagenomic assemblies were annotated  
23 using the DOE-JGI IMG Annotation Pipeline [109,110] (v.5.0.15). Protein-level assemblies  
24 obtained with PLASS were annotated using KofamScan [111] (KOfam release 2020-12-08,  
25 parameters: ‘--e-value 0.01’), a modified version of PfamScan (available at

1 [https://github.com/apcamargo/hpc\\_pfam\\_search](https://github.com/apcamargo/hpc_pfam_search)) to assign Pfam (release 33.1) families,  
2 and hmmsearch to assign TIGRFAM (release 15.0) families (parameters: '--cut\_nc'). MAGs  
3 were annotated using a modified version of EnrichM (version 0.5.0, available at  
4 <https://github.com/apcamargo/enrichM>), manually modified to update the Pfam (release  
5 33.1) and KEGG (release 2020-05-10) databases and to use pre-established thresholds ('-  
6 -cut\_ga' for Pfam, '--cut\_nc' for TIGRFAM). Additionally, transporters were identified by  
7 querying metagenomic protein sequences against reference transporters from the TCDB  
8 database [112] (release 2021/04/07) with MMSeqs2 [113] (release 13-45111) (search  
9 parameters: '-e 1e-5 --min-seq-id 0.3 -c 0.7 -s 7.5') and extracting the best hit for each query.  
10 Carbohydrate active (CAZy) enzymes were annotated using hmmscan to query  
11 metagenomic proteins to dbCAN [114] (version 9) profiles and then filtering the results with  
12 dbCAN's hmmscan-parser script (thresholds: alignment coverage  $\geq$  35%, E-value  $\leq$  1e-18).  
13 Proteins predicted from the 16 metagenomic and 12 PLASS assemblies were jointly  
14 clustered using Linclust [115] (version 12.113e3). We clustered proteins at multiple identity  
15 levels (100%, 95%, 90%, and 50%, using the '--min-seq-id' parameter), requiring that the  
16 proteins within a cluster had at least 90% of their sequence length covered by the cluster  
17 representative (parameters: '--cluster-mode 2 --cov-mode 1 -c 0.9 --kmer-per-seq 80').

#### 18 Read-level gene identification

19 We used GraftM [116] (version 0.13.1) to identify target genes directly from read sequences  
20 and assign them to a taxonomy according to their phylogenetic placement. This approach  
21 was employed in cases where we expected the genes to be poorly represented in the  
22 assemblies: orthologs of the *Saccharomyces cerevisiae* high-affinity phosphate:H<sup>+</sup>  
23 symporter (*PHO84*), and *Bradyrhizobium* orthologs of the *nifH* gene. In the former case,  
24 read-level identification was used because eukaryotic contigs are remarkably difficult to

1 assemble in complex metagenomes, while in the latter this approach was necessary to  
2 increase the detection sensitivity of genes encoded by endosymbiotic bacteria.

3 To identify the *PHO84* orthologs in our reads, we retrieved all UniProt (release 2020\_06)  
4 protein sequences assigned to the TIGR00887 TIGRFAM family and used them, as well as  
5 their taxonomies, as inputs to generate a custom GraftM database. During this process,  
6 manual intervention was required to root the phylogenetic tree using phytools (version 0.7-  
7 70) 'midpoint.root' function. For *nifH*, we retrieved all genes annotated with the K02588 KO  
8 term from AnnoTree [69] (doi:10.5281/zenodo.3732466), as well as their taxonomic  
9 lineages, and used them to build GraftM databases.

#### 10 MAG metabolic potential inference

11 Due to the inherent incompleteness of MAGs, it is challenging to ascertain their metabolic  
12 potential, as it can be uncertain whether the absence of a given gene is due to technical (the  
13 gene was not assembled or binned) or biological (the gene is not in the source genome)  
14 reasons [117]. Thus, to determine the metabolic potential of the retrieved MAGs, we  
15 established a series of criteria based on the presence/absence of key genes, the  
16 completeness of multiprotein complexes, and the fraction of genes in KEGG modules.  
17 Specifically:

18 **Photosynthesis:** at least one protein of a photosynthetic reaction center  
19 (annotations: K02689, K02690, K08928, K08929, K02703, K02706, K08940,  
20 PF00223, PF00124).

21 **CBB cycle:** at least 60% of the metabolic steps in the KEGG module (M00165) and  
22 at least one Rubisco subunit (annotations: K01601, K01602).

23 **Aerobic CO oxidation:** encode the catalytic subunit of the aerobic carbon monoxide  
24 dehydrogenase (*coxL*) (annotation: TIGR02416).

1       **Nitrogen fixation:** at least two subunits of the *nifHDK* complex (annotations:  
2       K02588, K02591, K02586).

3       **Ammonia oxidation:** at least two subunits of the *amoABC/pmoABC* complex  
4       (annotations: K10944, K10945, K10946).

5       **Hydroxylamine oxidation to nitrite:** presence of the *hao* and cytochrome c554  
6       (necessary for proper *hao* function [118]) genes (annotations: K10535, PF13435).  
7       As Archaea can produce nitrite from ammonia without a *hao* ortholog [50], we  
8       considered that all archaeal MAGs capable of ammonia oxidation were also able to  
9       oxidize hydroxylamine.

10       **Hydroxylamine oxidation to nitrous oxide:** encode at least one gene containing  
11       the Cytochrome P460 domain (annotation: PF16694).

## 12       Gene abundance estimation

13       To quantify gene abundance across all samples, we first used Linclust to dereplicate  
14       nucleotide sequences of the genes predicted from the 16 assemblies by clustering them at  
15       100% identity ('--cluster-mode 2 --cov-mode 1 --min-seq-id 1.00 -c 0.9 --kmer-per-seq 80').  
16       Next, Salmon (version 1.4.0) [119] was executed to map the reads from the 12 metagenomic  
17       samples to the dereplicated gene set and estimate read counts and effective lengths for  
18       each gene representative in each sample (parameters: '--meta'). Last, we quantified gene  
19       abundance using the RPKG (reads per kilobase per genome equivalent) metric so that the  
20       values are proportional to the expected gene copy number per cell and comparable between  
21       different libraries [120]. To do that, we first estimated the average genome size of each  
22       sample using MicrobeCensus [120] (version 1.1.1) and then determined the number of  
23       genome equivalents (GE) as  $(Sample\ read\ count * 300) / Average\ genome\ size$ , where 300  
24       corresponds to the total length of each read pair. Next, RPKG was computed using the

1 following formula:  $(Mapped\ reads * 1,000)/(Effective\ length * GE)$ . The effective lengths  
2 of each gene in each sample were obtained from Salmon's output.

### 3 Functional comparison between metagenomes

4 We used RPKG values to evaluate differences in the the carbon, phosphorus, and nitrogen  
5 turnover potential between the substrate and root-associated communities. To do that, we  
6 first summed the RPKGs of genes associated with the same biological process (e.g.:  
7 nitrogen fixation) and then evaluated for systematic differences in abundance between the  
8 contrasted conditions using LMMs as follows:  $\log_{10}(RPKG + 1) = \beta \times N + H + P + E$ , where  
9  $\beta$  is the regression coefficient,  $S$  is the environment (substrate or root),  $H$  and  $P$  are the  
10 random effects of the host plant species and the biological process, respectively, and  $E$  is a  
11 vector of errors.

12 Gene abundance data was also used to functionally contrast the metagenomes of *V.*  
13 *epidendroides* and *B. macrantha* by identifying (1) KEGG modules and pathways that are  
14 significantly enriched in the communities associated with one plant relative to other, and (2)  
15 modules and pathways that are enriched among the genes that are similarly abundant in the  
16 metagenomes of both plants. To do that, we translated the dereplicated gene set using  
17 gotranseq (version 0.2.2, available at <https://github.com/feliixx/gotranseq>) with the  
18 translation table 11 and clustered the resulting proteins at 90% sequence identity (Linclust  
19 parameters: '--cluster-mode 2 --cov-mode 1 --min-seq-id 0.90 -c 0.9 --kmer-per-seq 80').  
20 These protein-level cluster definitions were then used to aggregate Salmon's gene-level  
21 estimates into cluster-level abundances using tximport's [121] (version 1.18.0) 'scaledTPM'  
22 approach. These cluster-level abundances were then imported into a DESeq2 [122] (version  
23 1.30.0) object and between-sample normalization was performed by setting the library size  
24 factor as the ratio between the number of GEs in the sample and the median of the number

1 of GEs across all samples, so that the libraries had a similar number of GEs after  
2 normalization. This decision was made so that subsequent statistical tests would effectively  
3 compare the expected number of gene cluster copies per cell, a biologically meaningful  
4 quantity [120,123].

5 Highly differentially abundant gene clusters ( $\log_2$  fold changes  $\geq 0.5$  or  $\leq -0.5$ ) were  
6 identified using a Wald test with strict filtering criteria (s-value  $\leq 0.005$ ; DESeq2 options:  
7 'altHypothesis = "greaterAbs", lfcThreshold = 0.5'). Significant enrichment of KEGG modules  
8 and pathways (FDR  $\leq 0.05$ , score  $> 0$ ) in the communities associated with each plant was  
9 appraised using the Kolmogorov-Smirnov test — as implemented in the hypeR library — on  
10 lists of gene clusters ranked by apeglm-shrunken [124]  $\log_2$  fold changes. Conversely, the  
11 modules and pathways that are significantly enriched (FDR  $\leq 0.05$ ) among the gene clusters  
12 with small differences in average genomic copy number between the microbiomes of the  
13 two conditions were identified by selecting gene clusters with significant low  $\log_2$  fold  
14 changes (Wald test FDR  $\leq 0.05$ ; DESeq2 options: 'altHypothesis = "lessAbs", lfcThreshold  
15 = 4') and then performing a hypergeometric test using hypeR. For these analyses, we  
16 assigned to each gene cluster the KOs of all the genes within it and then designated KEGG  
17 modules and pathways according to the KO-to-module and KO-to-pathway relationships  
18 retrieved using KEGG's REST API (release 97, 2021/01). Substrate and root-associated  
19 metagenomes were processed together.

#### 20 Protein family copy number comparison between MAGs and GTDB genomes

21 To appraise potential genomic adaptations of bacteria from the *campos rupestres* regarding  
22 P nutrition, we employed phylogenetic regressions, as implemented in the phylolm [125]  
23 package (version 2.6.2, function) to test whether genomes retrieved from *campos rupestres*  
24 communities have significant changes regarding the number of genes involved in P turnover  
25 processes. To account for differences in genome size, we decided to use the genic density

1 (number of genes per Mb) as the response variable using the following formula:  $N * 10^6 / Genome\ size = \beta \times CP + E$ , where  $N$  represents the number of genes involved in P  
2 turnover processes in the genome,  $CP$  represents a binary predictor variable that indicates  
3 whether the genome was retrieved from the *campos rupestres*, and  $E$  is phylogenetic  
4 covariance-aware vector of errors. In all instances we used the 'phylolm' function with the  
5 'model = "lambda"' parameter to use Pagel's  $\lambda$  [126] to measure the phylogenetic  
6 covariance.  
7

8 Functional annotations for all GTDB (release 89) bacterial genomes were retrieved from  
9 AnnoTree. To avoid biases that could arise due to different annotation methods used for KO  
10 term assignment by AnnoTree and our MAG annotation pipeline, we reannotated our MAGs  
11 using EnrichM's UniProt-based KO assignment with the same thresholds used by AnnoTree.

## 12 Biosynthetic gene cluster identification and clustering

13 To identify biosynthetic gene clusters (BGCs) regions, we used antiSMASH [127] (version  
14 5.1.2), ignoring contigs shorter than 5 kb. We then used BiG-SCAPE [128] (version 1.0.1)  
15 with the '--cutoffs 0.5 --clan\_cutoff 0.5 0.7 --mibig' parameters to cluster these regions into  
16 gene cluster families (GCFs), and then cluster GCFs into gene cluster clans (GCC).

17 To investigate the structural organization diversity of siderophore BGCs in more detail, we  
18 set aside all the metagenomic BGS regions where antiSMASH identified at least one  
19 siderophore cluster (characterized by the presence of a *lucA\_lucC* domain) and executed  
20 BiG-SCAPE on then with the '--cutoffs 1.0' parameter to obtain an all-versus-all distance  
21 matrix which was then used to hierarchically cluster the siderophore BGCs using the  
22 UPGMA algorithm, as implemented in the 'linkage' function of the SciPy [129] (version 1.5.4)  
23 library. To reduce BGC structural redundancy for visual representation (Figure 6), groups of  
24 highly similar BGC regions were identified with SciPy's 'fcluster' function, using the

1 inconsistency criterion and a 0.1 threshold, and only the medoid within each group was  
2 selected for graphical representation (23 out of a total of 42 BGC regions). CoverM (version  
3 0.3.2) was used to measure the average coverage of contigs containing representative  
4 siderophore BGCs (parameters: '--min-read-percent-identity 0.95 --methods mean').

#### 5 Phylogenetic analysis of nitrogenase genes

6 To assess the diversity of the *nifH* gene we fetched all the metagenomic proteins that were  
7 annotated with the K02588 KO term and retrieved selected orthologs belonging to *nifH*  
8 groups I, II, and III [45] from UniProt (release 2020\_06) (Suppl. Figure 7B, labels in grey).  
9 Linclust was then used to cluster identical sequences from the combined set of *campos*  
10 *rupestres* and reference *nifH* (parameters: '--cluster-mode 2 --cov-mode 1 --min-seq-id 1.0  
11 -c 0.9 --kmer-per-seq 80'). The dereplicated *nifH* sequences were then subjected to a two-  
12 step alignment process: the sequences were first aligned with MAFFT (parameters: '--auto')  
13 and poorly aligned proteins were identified and removed from the alignment using trimAl  
14 [130] (version 1.4.1) with the '-resoverlap 0.3 -seqoverlap 90' parameters. The remaining  
15 sequences were then realigned and unreliable regions were trimmed with trimAl  
16 (parameters: '-automated1'). Finally, we used IQ-TREE (parameters: '-B 1000') to infer the  
17 maximum likelihood tree from the resulting alignment.

18 To evaluate the hypothesis that the *campos rupestres* Isosphaeraceae *nif* complex was  
19 acquired by HGT, we reconstructed a nitrogenase phylogenetic tree using sequences from  
20 the *niH* and *nifD* subunits. In addition to the orthologs encoded by the Isosphaeraceae  
21 MAGs, we retrieved *niH* and *nifD* sequences from all *nif*-encoding Planctomycetota  
22 (AnnoTree r89), from Frankia, and from selected Gammaproteobacteria with high sequence  
23 identity to the MAGs' genes (UniProt release 2020\_06) (Suppl. Figure 7C). Next, we  
24 generated multiple sequence alignments for the *nifH* and *nifD* sequences using MAFFT ('--  
25 auto') and trimmed them with trimAl ('-automated1'). Finally, IQ-TREE ('-B 1000') was



1 employed to infer the maximum likelihood *nifHD* tree using the alignments of both subunits  
2 in a partitioned model. To further support the *nif* HGT hypothesis, we used clinker [131]  
3 (version 0.0.16) to compare a *nif*-containing Isosphaeraceae contig to the *Pseudomonas*  
4 *stutzeri* A1501 (accession: GCA\_000013785.1) *nif* cluster.

#### 5 Identification of bacteriophages, proviruses, and their associated hosts

6 To identify contigs representing bacteriophage genomes or provirus insertions in host  
7 sequences, we employed VIBRANT [132] (version 1.2.1) to scan all the metagenome  
8 assemblies. The resulting sequences were then processed by CheckV [133] (version 0.7.0)  
9 to remove low-quality viral fragments and refine the boundaries between host and provirus  
10 regions. Auxiliary metabolic genes were identified in the remaining sequences using  
11 KofamScan (KOfam release 2020-05-10). To assign taxonomy to provirus hosts we first  
12 removed the predicted viral regions from provirus-bearing contigs and then used  
13 MAGpurify2 (version 1.0.0, database available at doi: 10.5281/zenodo.3817702) to classify  
14 the provirus-free segments.

#### 15 **Data availability**

16 16S and ITS amplicon sequencing data are available at the NCBI Sequence Read Archive  
17 (SRA) under the BioProject PRJNA522264. The SRA and IMG identifiers associated with  
18 the metagenomic data are listed in [Suppl. Table 1](#). The metagenome-assembled genomes  
19 used in this work were deposited in GenBank and their accessions are listed in [Suppl. Table](#)  
20 [2](#). Supplementary files containing additional processed data are available at  
21 <https://doi.org/10.17605/OSF.IO/XKDTV>.

#### 22 **Funding**

23 This work was supported by grants from Fundação de Amparo à Pesquisa do Estado de  
24 São Paulo (FAPESP) (2016/23218-0) and Coordenação de Aperfeiçoamento de Pessoal

1 de Nível Superior (CAPES) (88881.068071/2014-01). A.P.C. received a scholarship  
2 (2018/04240-0) from FAPESP. R.S.C.S received a postdoctoral fellowship (2018/19100-9)  
3 from FAPESP. I.R.G. and P.A. are Conselho Nacional de Desenvolvimento Científico e  
4 Tecnológico (CNPq) research fellows. The work conducted by the US Department of Energy  
5 Joint Genome Institute is supported by the Office of Science of the US Department of Energy  
6 under contract no. DE-AC02-05CH11231.

## 7 **References**

- 8 1. Oliveira RS, Abrahão A, Pereira C, Teodoro GS, Brum M, Alcantara S, et al.  
9 Ecophysiology of campos rupestres plants. *Ecol Conserv Mt Grasslands Brazil*. 2016. p.  
10 227–72.
- 11 2. Silveira FAO, Negreiros D, Barbosa NPU, Buisson E, Carmo FF, Carstensen DW, et al.  
12 Ecology and evolution of plant diversity in the endangered campo rupestre: a neglected  
13 conservation priority. *Plant Soil*. 2016;403:129–52.
- 14 3. Rapini A, Bitencourt C, Luebert F, Cardoso D. An escape-to-radiate model for explaining  
15 the high plant diversity and endemism in campos rupestres. *Biol J Linn Soc*. 2021;133:481–  
16 98.
- 17 4. Negreiros D, Le Stradic S, Fernandes GW, Rennó HC. CSR analysis of plant functional  
18 types in highly diverse tropical grasslands of harsh environments. *Plant Ecol*. 2014;215:379–  
19 88.
- 20 5. Teodoro GS, Lambers H, Nascimento DL, de Britto Costa P, Flores-Borges DNA, Abrahão  
21 A, et al. Specialized roots of Velloziaceae weather quartzite rock while mobilizing  
22 phosphorus using carboxylates. *Funct Ecol*. 2019;33:762–73.
- 23 6. Abrahão A, Costa P de B, Lambers H, Andrade SAL, Sawaya ACHF, Ryan MH, et al. Soil  
24 types select for plants with matching nutrient-acquisition and -use traits in hyperdiverse and

- 1 severely nutrient-impovertished campos rupestres and cerrado in Central Brazil. *J Ecol.*
- 2 2019;107:1302–16.
- 3 7. Abrahão A, de Britto Costa P, Teodoro GS, Lambers H, Nascimento DL, Adrián López de
- 4 Andrade S, et al. Vellozioid roots allow for habitat specialization among rock- and soil-
- 5 dwelling Velloziaceae in campos rupestres. *Funct Ecol.* 2020;34:442–57.
- 6 8. Mishra S, Hättenschwiler S, Yang X. The plant microbiome: A missing link for the
- 7 understanding of community dynamics and multifunctionality in forest ecosystems. *Appl Soil*
- 8 *Ecol.* 2020;145.
- 9 9. Vandenkoornhuyse P, Quaiser A, Duhamel M, Le Van A, Dufresne A. The importance of
- 10 the microbiome of the plant holobiont. *New Phytol.* 2015;206:1196–206.
- 11 10. Levy A, Salas Gonzalez I, Mittelviehhaus M, Clingenpeel S, Herrera Paredes S, Miao J,
- 12 et al. Genomic features of bacterial adaptation to plants. *Nat Genet.* 2018;50:138–50.
- 13 11. Geml J, Wagner MR. Out of sight , but no longer out of mind – towards an increased
- 14 recognition of the role of soil microbes in plant speciation. 2018;
- 15 12. Heijden MGA van der, M. RDB and N, Straalen V. The unseen majority: soil microbes
- 16 as drivers of plant diversity and productivity in terrestrial ecosystems. 2008;296–310.
- 17 13. Hobbie JE, Hobbie EA. <sup>15</sup>N in symbiotic fungi and plants estimates nitrogen and carbon
- 18 flux rates in Arctic tundra. *Ecology.* 2006;87:816–22.
- 19 14. Geml J, Wagner MR. Out of sight, but no longer out of mind - towards an increased
- 20 recognition of the role of soil microbes in plant speciation. *New Phytol.* 2018;217:965–7.
- 21 15. Oliveira RS, Galvão HC, de Campos MCR, Eller CB, Pearse SJ, Lambers H. Mineral
- 22 nutrition of campos rupestres plant species on contrasting nutrient-impovertished soil types.
- 23 *New Phytol.* 2015;205:1183–94.

- 1 16. Jain C, Rodriguez-R LM, Phillippy AM, Konstantinidis KT, Aluru S. High throughput ANI  
2 analysis of 90K prokaryotic genomes reveals clear species boundaries. *Nat Commun.*  
3 2018;9.
- 4 17. Steinegger M, Mirdita M, Soding J. Protein-level assembly increases protein sequence  
5 recovery from metagenomic samples manyfold. *Nat Methods.* 2019;16:603–6.
- 6 18. Yarza P, Yilmaz P, Pruesse E, Glöckner FO, Ludwig W, Schleifer KH, et al. Uniting the  
7 classification of cultured and uncultured bacteria and archaea using 16S rRNA gene  
8 sequences. *Nat Rev Microbiol* [Internet]. Nature Publishing Group; 2014;12:635–45.  
9 Available from: <http://dx.doi.org/10.1038/nrmicro3330>
- 10 19. Fierer N. Embracing the unknown: Disentangling the complexities of the soil microbiome.  
11 *Nat Rev Microbiol* [Internet]. Nature Publishing Group; 2017;15:579–90. Available from:  
12 <http://dx.doi.org/10.1038/nrmicro.2017.87>
- 13 20. Delgado-Baquerizo M, Oliverio AM, Brewer TE, Benavent-González A, Eldridge DJ,  
14 Bardgett RD, et al. A global atlas of the dominant bacteria found in soil. *Science* (80- ).  
15 2018;359:320–5.
- 16 21. Leach JE, Tringe SG. Plant–microbiome interactions: from community assembly to plant  
17 health. *Nat Rev Microbiol* [Internet]. Springer US; 2020;18. Available from:  
18 <http://dx.doi.org/10.1038/s41579-020-0412-1>
- 19 22. Oliverio AM, Bissett A, McGuire K, Saltonstall K, Turner BL, Fierer N. The role of  
20 phosphorus limitation in shaping soil bacterial communities and their metabolic capabilities.  
21 *MBio.* 2020;11:1–16.
- 22 23. C. PE. The measurement of diversity in different types of biological collections. *J Theor*  
23 *Biol.* 1966;13:131–44.

- 1 24. F. Tajima. Statistical method for testing the neutral mutation hypothesis by DNA  
2 polymorphism. *Genetics*. 1989;123:585-595.
- 3 25. Zhalnina K, Louie KB, Hao Z, Mansoori N, Da Rocha UN, Shi S, et al. Dynamic root  
4 exudate chemistry and microbial substrate preferences drive patterns in rhizosphere  
5 microbial community assembly. *Nat Microbiol*. 2018;3:470–80.
- 6 26. Sasse J, Martinoia E, Northen T. Feed Your Friends: Do Plant Exudates Shape the Root  
7 Microbiome? *Trends Plant Sci* [Internet]. Elsevier Ltd; 2018;23:25–41. Available from:  
8 <http://dx.doi.org/10.1016/j.tplants.2017.09.003>
- 9 27. Camargo AP, de Souza RSC, de Britto Costa P, Gerhardt IR, Dante RA, Teodoro GS,  
10 et al. Microbiomes of Velloziaceae from phosphorus-impooverished soils of the campos  
11 rupestres, a biodiversity hotspot. *Sci Data* [Internet]. 2019;6:140. Available from:  
12 <http://www.nature.com/articles/s41597-019-0141-3>
- 13 28. Liang JL, Liu J, Jia P, Yang T tao, Zeng Q wei, Zhang S chang, et al. Novel phosphate-  
14 solubilizing bacteria enhance soil phosphorus cycling following ecological restoration of land  
15 degraded by mining. *ISME J*. 2020;14:1600–13.
- 16 29. Raymond NS, Gómez-Muñoz B, van der Bom FJT, Nybroe O, Jensen LS, Müller-Stöver  
17 DS, et al. Phosphate-solubilising microorganisms for improved crop productivity: a critical  
18 assessment. *New Phytol*. 2021;229:1268–77.
- 19 30. Alori ET, Glick BR, Babalola OO. Microbial phosphorus solubilization and its potential  
20 for use in sustainable agriculture. *Front Microbiol*. 2017;8:1–8.
- 21 31. Akiyama M, Crooke E, Kornberg A. An exopolyphosphatase of *Escherichia coli*. The  
22 enzyme and its ppx gene in a polyphosphate operon. *J Biol Chem*. 1993;268:633–9.
- 23 32. Harold FM. *Inorganic polyphosphates in biology: structure, metabolism, and function*.

- 1 Bacteriol Rev. 1966;30:772–94.
- 2 33. Ahmed E, Holmström SJM. Siderophores in environmental research: Roles and  
3 applications. *Microb Biotechnol* [Internet]. John Wiley and Sons Ltd; 2014 [cited 2021 Jan  
4 27];7:196–208. Available from: [/pmc/articles/PMC3992016/?report=abstract](https://pubmed.ncbi.nlm.nih.gov/20376388/)
- 5 34. Hider RC, Kong X. Chemistry and biology of siderophores [Internet]. *Nat. Prod. Rep. Nat*  
6 *Prod Rep*; 2010 [cited 2021 Jan 27]. p. 637–57. Available from:  
7 <https://pubmed.ncbi.nlm.nih.gov/20376388/>
- 8 35. Cruz-Morales P, Ramos-Aboites HE, Licona-Cassani C, Selem-Mójica N, Mejía-Ponce  
9 PM, Souza-Saldívar V, et al. Actinobacteria phylogenomics, selective isolation from an iron  
10 oligotrophic environment and siderophore functional characterization, unveil new  
11 desferrioxamine traits. *FEMS Microbiol Ecol* [Internet]. Oxford University Press; 2017 [cited  
12 2021 Jan 27];93. Available from: <http://technelysium.com.au/wp/chromas/>
- 13 36. Bruns H, Crüsemann M, Letzel AC, Alanjary M, McInerney JO, Jensen PR, et al.  
14 Function-related replacement of bacterial siderophore pathways. *ISME J* [Internet]. Nature  
15 Publishing Group; 2018 [cited 2021 Jan 27];12:320–9. Available from:  
16 <https://img.jgi.doe.gov/er>
- 17 37. Brundrett MC. Mycorrhizal associations and other means of nutrition of vascular plants:  
18 Understanding the global diversity of host plants by resolving conflicting information and  
19 developing reliable means of diagnosis. *Plant Soil*. 2009;320:37–77.
- 20 38. Zemunik G, Lambers H, Turner BL, Laliberté E, Oliveira RS. High abundance of non-  
21 mycorrhizal plant species in severely phosphorus-impooverished Brazilian campos rupestres.  
22 *Plant Soil*. 2018;424:255–71.
- 23 39. Plassard C, Becquer A, Garcia K. Phosphorus Transport in Mycorrhiza: How Far Are  
24 We? *Trends Plant Sci*. 2019;24:794–801.

- 1 40. Xie X, Lin H, Peng X, Xu C, Sun Z, Jiang K, et al. Arbuscular Mycorrhizal Symbiosis  
2 Requires a Phosphate Transceptor in the *Gigaspora margarita* Fungal Symbiont. *Mol Plant*.  
3 2016;9:1583–608.
- 4 41. Sanz-Ros A V., Müller MM, San Martín R, Diez JJ. Fungal endophytic communities on  
5 twigs of fast and slow growing Scots pine (*Pinus sylvestris* L.) in northern Spain. *Fungal Biol*.  
6 2015;119:870–83.
- 7 42. Grünig CR, Queloz V, Sieber TN. Structure of Diversity in Dark Septate Endophytes:  
8 From Species to Genes. 2011;3–30.
- 9 43. Knapp DG, Imrefi I, Boldpurev E, Csíkó S, Akhmetova G, Berek-Nagy PJ, et al. Root-  
10 Colonizing Endophytic Fungi of the Dominant Grass *Stipa krylovii* From a Mongolian Steppe  
11 Grassland. *Front Microbiol*. 2019;10.
- 12 44. Schüßler A, Schwarzott D, Walker C. A new fungal phylum, the Glomeromycota:  
13 Phylogeny and evolution. *Mycol Res*. 2001;105:1413–21.
- 14 45. Raymond J, Siefert JL, Staples CR, Blankenship RE. The Natural History of Nitrogen  
15 Fixation. *Mol Biol Evol*. 2004;21:541–54.
- 16 46. Yan Y, Yang J, Dou Y, Chen M, Ping S, Peng J, et al. Nitrogen fixation island and  
17 rhizosphere competence traits in the genome of root-associated *Pseudomonas stutzeri*  
18 A1501. *Proc Natl Acad Sci U S A*. 2008;105:7564–9.
- 19 47. Skorupska A, Janczarek M, Marczak M, Mazur A, Król J. Rhizobial exopolysaccharides:  
20 Genetic control and symbiotic functions. *Microb Cell Fact*. 2006;5.
- 21 48. Roux S, Páez-Espino D, Chen I-MA, Palaniappan K, Ratner A, Chu K, et al. IMG/VR v3:  
22 an integrated ecological and evolutionary framework for interrogating genomes of  
23 uncultivated viruses. *Nucleic Acids Res*. 2021;49:D764–75.

- 1 49. George AK, John RS. Ammonia-Oxidizing Bacteria: A Model for Molecular Microbial  
2 Ecology. *Annu Rev Microbiol* [Internet]. 2001;55:485–529. Available from:  
3 <http://arjournals.annualreviews.org/doi/abs/10.1146/annurev.micro.55.1.485>
- 4 50. Vajrala N, Martens-Habbena W, Sayavedra-Soto LA, Schauer A, Bottomley PJ, Stahl  
5 DA, et al. Hydroxylamine as an intermediate in ammonia oxidation by globally abundant  
6 marine archaea. *Proc Natl Acad Sci U S A*. 2013;110:1006–11.
- 7 51. Mohammadi SS, Pol A, van Alen T, Jetten MSM, den Camp HJMO. Ammonia oxidation  
8 and nitrite reduction in the verrucomicrobial methanotroph *Methylacidiphilum fumarolicum*  
9 *SolV*. *Front Microbiol*. 2017;8.
- 10 52. Murphy CL, Dunfield PF, Sheremet A, Spear JR, Woyke T, Elshahed MS, et al.  
11 Methylophily, alkane-degradation, and pigment production as defining features of the  
12 globally distributed yet-uncultured phylum Binatota. *bioRxiv*. 2020;
- 13 53. Naylor D, Coleman-Derr D. Drought stress and root-associated bacterial communities.  
14 *Front Plant Sci*. 2018;8.
- 15 54. Veneklaas EJ, Stevens J, Cawthray GR, Turner S, Grigg AM, Lambers H. Chickpea and  
16 white lupin rhizosphere carboxylates vary with soil properties and enhance phosphorus  
17 uptake. *Struct Funct Clust Roots Plant Responses to Phosphate Defic*. 2003;187–97.
- 18 55. Dedysh SN, Kulichevskaya IS, Huber KJ, Overmann J. Defining the taxonomic status of  
19 described subdivision 3 acidobacteria: Proposal of *Bryobacteraceae* fam. nov. *Int J Syst*  
20 *Evol Microbiol*. 2017;67:498–501.
- 21 56. van Bergeijk DA, Terlouw BR, Medema MH, van Wezel GP. Ecology and genomics of  
22 Actinobacteria: new concepts for natural product discovery. *Nat. Rev. Microbiol*. 2020.
- 23 57. Delmont TO, Quince C, Shaiber A, Esen ÖC, Lee ST, Rappé MS, et al. Nitrogen-fixing



- 1 populations of Planctomycetes and Proteobacteria are abundant in surface ocean  
2 metagenomes. *Nat Microbiol.* 2018;3:804–13.
- 3 58. Lindsay MR, Webb RI, Strous M, Jetten MSM, Butler MK, Forde RJ, et al. Cell  
4 compartmentalisation in planctomycetes: Novel types of structural organisation for the  
5 bacterial cell. *Arch Microbiol.* 2001;175:413–29.
- 6 59. Van Niftrik LA, Fuerst JA, Sinninghe Damsté JS, Kuenen JG, Jetten MSM, Strous M.  
7 The anammoxosome: An intracytoplasmic compartment in anammox bacteria. *FEMS*  
8 *Microbiol Lett.* 2004;233:7–13.
- 9 60. Bolhuis H, Severin I, Confurius-Guns V, Wollenzien UIA, Stal LJ. Horizontal transfer of  
10 the nitrogen fixation gene cluster in the cyanobacterium *Microcoleus chthonoplastes*. *ISME*  
11 *J.* 2010;4:121–30.
- 12 61. Parsons C, Stüeken EE, Rosen CJ, Mateos K, Anderson RE. Radiation of nitrogen-  
13 metabolizing enzymes across the tree of life tracks environmental transitions in Earth  
14 history. *Geobiology.* 2021;19:18–34.
- 15 62. Kechris KJ, Lin JC, Bickel PJ, Glazer AN. Quantitative exploration of the occurrence of  
16 lateral gene transfer by using nitrogen fixation gene as a case study. *Proc Natl Acad Sci U*  
17 *S A.* 2006;103:9584–9.
- 18 63. Liu Y, Wu L, Baddeley JA, Watson CA. Models of biological nitrogen fixation of legumes.  
19 A review. *Agron Sustain Dev.* 2011;31:155–72.
- 20 64. Breitbart M, Thompson LR, Suttle CA, Sullivan MB. Exploring the vast diversity of marine  
21 viruses. *Oceanography.* 2007;20:135–9.
- 22 65. Thompson LR, Zeng Q, Kelly L, Huang KH, Singer AU, Stubbe JA, et al. Phage auxiliary  
23 metabolic genes and the redirection of cyanobacterial host carbon metabolism. *Proc Natl*

- 1 Acad Sci U S A. 2011;108.
- 2 66. Warwick-Dugdale J, Buchholz HH, Allen MJ, Temperton B. Host-hijacking and  
3 planktonic piracy: How phages command the microbial high seas. *Viol J.* 2019;16.
- 4 67. Nayfach S, Roux S, Seshadri R, Udway D, Varghese N, Schulz F, et al. A genomic  
5 catalog of Earth's microbiomes. *Nat Biotechnol.* 2020;
- 6 68. Hug LA, Co R. It Takes a Village: Microbial Communities Thrive through Interactions and  
7 Metabolic Handoffs. *mSystems.* 2018;3.
- 8 69. Mendler K, Chen H, Parks DH, Lobb B, Hug LA, Doxey AC. Annotree: Visualization and  
9 exploration of a functionally annotated microbial tree of life. *Nucleic Acids Res.*  
10 2019;47:4442–8.
- 11 70. Zahn JA, Duncan C, DiSpirito AA. Oxidation of hydroxylamine by cytochrome P-460 of  
12 the obligate methylotroph *Methylococcus capsulatus* Bath. *J Bacteriol.* 1994;176:5879–87.
- 13 71. Liu S, Han P, Hink L, Prosser JI, Wagner M, Brüggemann N. Abiotic Conversion of  
14 Extracellular NH<sub>2</sub>OH Contributes to N<sub>2</sub>O Emission during Ammonia Oxidation. *Environ Sci*  
15 *Technol.* 2017;51:13122–32.
- 16 72. Ermel M, Behrendt T, Oswald R, Derstroff B, Wu D, Hohlmann S, et al. Hydroxylamine  
17 released by nitrifying microorganisms is a precursor for HONO emission from drying soils.  
18 *Sci Rep.* 2018;8.
- 19 73. Moews PC, Audrieth LF. The autoxidation of hydroxylamine. *J Inorg Nucl Chem.*  
20 1959;11:242–6.
- 21 74. Heil J, Vereecken H, Brüggemann N. A review of chemical reactions of nitrification  
22 intermediates and their role in nitrogen cycling and nitrogen trace gas formation in soil. *Eur*  
23 *J Soil Sci.* 2016;67:23–39.

- 1 75. De Souza RSC, Okura VK, Armanhi JSL, Jorrín B, Lozano N, Da Silva MJ, et al.  
2 Unlocking the bacterial and fungal communities assemblages of sugarcane microbiome. *Sci*  
3 *Rep.* 2016;6.
- 4 76. Caporaso JG, Lauber CL, Walters WA, Berg-Lyons D, Lozupone CA, Turnbaugh PJ, et  
5 al. Global patterns of 16S rRNA diversity at a depth of millions of sequences per sample.  
6 *Proc Natl Acad Sci U S A.* 2011;108:4516–22.
- 7 77. White TJ, Bruns T, Lee S, Taylor J. Amplification and Direct Sequencing of Fungal  
8 Ribosomal RNA Genes for Phylogenetics. *PCR Protoc.* 1990;315–22.
- 9 78. Marcel M. Cutadapt removes adapter sequences from high-throughput sequencing  
10 reads. *EMBnet.journal.* 2013;17:10–2.
- 11 79. Callahan BJ, McMurdie PJ, Rosen MJ, Han AW, Johnson AJA, Holmes SP. DADA2:  
12 High-resolution sample inference from Illumina amplicon data. *Nat Methods.* 2016;13:581–  
13 3.
- 14 80. Murali A, Bhargava A, Wright ES. IDTAXA: A novel approach for accurate taxonomic  
15 classification of microbiome sequences. *Microbiome.* 2018;6.
- 16 81. Parks DH, Chuvochina M, Waite DW, Rinke C, Skarshewski A, Chaumeil PA, et al. A  
17 standardized bacterial taxonomy based on genome phylogeny substantially revises the tree  
18 of life. *Nat Biotechnol [Internet]. Nature Publishing Group;* 2018;36:996. Available from:  
19 <http://dx.doi.org/10.1038/nbt.4229>
- 20 82. Nilsson RH, Larsson KH, Taylor AFS, Bengtsson-Palme J, Jeppesen TS, Schigel D, et  
21 al. The UNITE database for molecular identification of fungi: Handling dark taxa and parallel  
22 taxonomic classifications. *Nucleic Acids Res.* 2019;47:D259–64.
- 23 83. Quast C, Pruesse E, Yilmaz P, Gerken J, Schweer T, Yarza P, et al. The SILVA

- 1 ribosomal RNA gene database project: Improved data processing and web-based tools.
- 2 Nucleic Acids Res. 2013;41.
- 3 84. Callahan BJ, Sankaran K, Fukuyama JA, McMurdie PJ, Holmes SP. Bioconductor
- 4 Workflow for Microbiome Data Analysis: from raw reads to community analyses.
- 5 F1000Research. 2016;5:1492.
- 6 85. McMurdie PJ, Holmes S. Phyloseq: An R Package for Reproducible Interactive Analysis
- 7 and Graphics of Microbiome Census Data. PLoS One. 2013;8.
- 8 86. Minh BQ, Schmidt H, Chernomor O, Schrempf D, Woodhams M, von Haeseler A, et al.
- 9 IQ-TREE 2: New models and efficient methods for phylogenetic inference in the genomic
- 10 era. bioRxiv. 2019;
- 11 87. Katoh K, Standley DM. MAFFT multiple sequence alignment software version 7:
- 12 Improvements in performance and usability. Mol Biol Evol. 2013;30:772–80.
- 13 88. Anderson MJ. Permutational Multivariate Analysis of Variance (PERMANOVA). Wiley
- 14 StatsRef Stat Ref Online. 2017;1–15.
- 15 89. Fernandes AD, Reid JNS, Macklaim JM, McMurrough TA, Edgell DR, Gloor GB. Unifying
- 16 the analysis of high-throughput sequencing datasets: Characterizing RNA-seq, 16S rRNA
- 17 gene sequencing and selective growth experiments by compositional data analysis.
- 18 Microbiome. 2014;2.
- 19 90. Federico A, Monti S. HypeR: An R package for geneset enrichment workflows.
- 20 Bioinformatics. 2020;36:1307–8.
- 21 91. Altschul SF, Gish W, Miller W, Myers EW, Lipman DJ. Basic local alignment search tool.
- 22 J Mol Biol. 1990;215:403–10.
- 23 92. Li D, Liu CM, Luo R, Sadakane K, Lam TW. MEGAHIT: An ultra-fast single-node solution

- 1 for large and complex metagenomics assembly via succinct de Bruijn graph. *Bioinformatics*.  
2 2015;31:1674–6.
- 3 93. Salzberg SL, Langmead B. Fast gapped-read alignment with Bowtie 2. *Nat Methods*  
4 [Internet]. 2012;1–4. Available from:  
5 <http://dx.doi.org/10.1038/nmeth.1923>  
6 94. Kang DD, Li F, Kirton E, Thomas A, Egan R, An H, et al. MetaBAT 2: An adaptive binning  
7 algorithm for robust and efficient genome reconstruction from metagenome assemblies.  
8 *PeerJ*. 2019;2019.
- 9 95. Wu YW, Simmons BA, Singer SW. MaxBin 2.0: An automated binning algorithm to  
10 recover genomes from multiple metagenomic datasets. *Bioinformatics*. 2016;32:605–7.
- 11 96. Alneberg J, Bjarnason BS, De Bruijn I, Schirmer M, Quick J, Ijaz UZ, et al. Binning  
12 metagenomic contigs by coverage and composition. *Nat Methods*. 2014;11:1144–6.
- 13 97. Nissen JN, Johansen J, Allesøe RL, Sønderby CK, Armenteros JJA, Grønbech CH, et  
14 al. Improved metagenome binning and assembly using deep variational autoencoders. *Nat*  
15 *Biotechnol*. 2021;
- 16 98. Sieber CMK, Probst AJ, Sharrar A, Thomas BC, Hess M, Tringe SG, et al. Dereplication,  
17 Aggregation and Scoring Strategy. *Nat Microbiol* [Internet]. 2018;3:1. Available from:  
18 <http://www.nature.com/articles/s41564-018-0171-1>  
19 [http://dx.doi.org/10.1038/s41564-](http://dx.doi.org/10.1038/s41564-018-0171-1)  
20 018-0171-1
- 21 99. Parks DH, Imelfort M, Skennerton CT, Hugenholtz P, Tyson GW. CheckM: Assessing  
22 the quality of microbial genomes recovered from isolates, single cells, and metagenomes.  
23 *Genome Res*. 2015;25:1043–55.
100. Bowers RM, Kyrpides NC, Stepanauskas R, Harmon-Smith M, Doud D, Reddy TBK,

- 1 et al. Minimum information about a single amplified genome (MISAG) and a metagenome-  
2 assembled genome (MIMAG) of bacteria and archaea. *Nat Biotechnol.* 2017;35:725–31.
- 3 101. Chaumeil P-A, Mussig AJ, Hugenholtz P, Parks DH. GTDB-Tk: a toolkit to classify  
4 genomes with the Genome Taxonomy Database. *Bioinformatics.* 2019;
- 5 102. Olm MR, Crits-Christoph A, Diamond S, Lavy A, Matheus Carnevali PB, Banfield JF.  
6 Consistent Metagenome-Derived Metrics Verify and Delineate Bacterial Species  
7 Boundaries. *mSystems.* 2020;5:e00731-19.
- 8 103. Parks DH, Chuvochina M, Chaumeil PA, Rinke C, Mussig AJ, Hugenholtz P. A  
9 complete domain-to-species taxonomy for Bacteria and Archaea. *Nat Biotechnol.* 2020;
- 10 104. Parks DH, Rinke C, Chuvochina M, Chaumeil PA, Woodcroft BJ, Evans PN, et al.  
11 Recovery of nearly 8,000 metagenome-assembled genomes substantially expands the tree  
12 of life. *Nat Microbiol* [Internet]. Springer US; 2017;2:1533–42. Available from:  
13 <http://dx.doi.org/10.1038/s41564-017-0012-7>
- 14 105. Sukumaran J, Holder MT. DendroPy: A Python library for phylogenetic computing.  
15 *Bioinformatics.* 2010;26:1569–71.
- 16 106. Kanehisa M, Sato Y, Kawashima M, Furumichi M, Tanabe M. KEGG as a reference  
17 resource for gene and protein annotation. *Nucleic Acids Res.* 2016;44:D457–62.
- 18 107. El-Gebali S, Mistry J, Bateman A, Eddy SR, Luciani A, Potter SC, et al. The Pfam  
19 protein families database in 2019. *Nucleic Acids Res.* 2019;47:D427–32.
- 20 108. Haft DH, Selengut JD, White O. The TIGRFAMs database of protein families. *Nucleic*  
21 *Acids Res.* 2003;31:371–3.
- 22 109. Chen IMA, Chu K, Palaniappan K, Pillay M, Ratner A, Huang J, et al. IMG/M v.5.0: An  
23 integrated data management and comparative analysis system for microbial genomes and

- 1 microbiomes. *Nucleic Acids Res.* 2019;47:D666–77.
- 2 110. Clum A, Huntemann M, Bushnell B, Foster B, Foster B, Roux S, et al. DOE JGI  
3 Metagenome Workflow. *mSystems.* 2021;6.
- 4 111. Aramaki T, Blanc-Mathieu R, Endo H, Ohkubo K, Kanehisa M, Goto S, et al.  
5 KofamKOALA: KEGG ortholog assignment based on profile HMM and adaptive score  
6 threshold. *bioRxiv.* 2019;
- 7 112. Saier MH, Reddy VS, Moreno-Hagelsieb G, Hendargo KJ, Zhang Y, Iddamsetty V, et  
8 al. The transporter classification database (TCDB): 2021 update. *Nucleic Acids Res.*  
9 2021;49:D461–7.
- 10 113. Steinegger M, Söding J. MMseqs2 enables sensitive protein sequence searching for  
11 the analysis of massive data sets. *Nat Biotechnol.* 2017;35:1026–8.
- 12 114. Yohe T, Xu Y, Huang L, Yin Y, Yang Z, Wu P, et al. dbCAN2: a meta server for  
13 automated carbohydrate-active enzyme annotation. *Nucleic Acids Res.* 2018;46:W95–101.
- 14 115. Steinegger M, Söding J. Clustering huge protein sequence sets in linear time. *Nat*  
15 *Commun.* 2018;9.
- 16 116. Boyd JA, Woodcroft BJ, Tyson GW. GraftM: a tool for scalable, phylogenetically  
17 informed classification of genes within metagenomes. *Nucleic Acids Res.* 2018;46:e59.
- 18 117. Ward LM, Shih PM, Fischer WW. MetaPOAP: presence or absence of metabolic  
19 pathways in metagenome-assembled genomes. *Bioinformatics.* 2018;34:4284–6.
- 20 118. Cedervall P, Hooper AB, Wilmot CM. Structural studies of hydroxylamine  
21 oxidoreductase reveal a unique heme cofactor and a previously unidentified interaction  
22 partner. *Biochemistry.* 2013;52:6211–8.
- 23 119. Patro R, Duggal G, Love MI, Irizarry RA, Kingsford C. Salmon provides fast and bias-

- 1 aware quantification of transcript expression. *Nat Methods*. 2017;14:417–9.
- 2 120. Nayfach S, Pollard KS. Average genome size estimation improves comparative  
3 metagenomics and sheds light on the functional ecology of the human microbiome. *Genome*  
4 *Biol*. 2015;16.
- 5 121. Soneson C, Love MI, Robinson MD. Differential analyses for RNA-seq: transcript-level  
6 estimates improve gene-level inferences. *F1000Research*. 2015;4:1521.
- 7 122. Love MI, Huber W, Anders S. Moderated estimation of fold change and dispersion for  
8 RNA-seq data with DESeq2. *Genome Biol*. 2014;15.
- 9 123. Beszteri B, Temperton B, Frickenhaus S, Giovannoni SJ. Average genome size: A  
10 potential source of bias in comparative metagenomics. *ISME J*. 2010;4:1075–7.
- 11 124. Zhu A, Ibrahim JG, Love MI. Heavy-tailed prior distributions for sequence count data:  
12 Removing the noise and preserving large differences. *bioRxiv*. 2018;
- 13 125. Ho LST, Ane C. A linear-time algorithm for Gaussian and non-Gaussian trait evolution  
14 models. *Syst Biol*. 2014;63:1–38.
- 15 126. Pagel M. Inferring the historical patterns of biological evolution. *Nature*. 1999;401:877–  
16 84.
- 17 127. Blin K, Shaw S, Steinke K, Villebro R, Ziemert N, Lee SY, et al. antiSMASH 5.0:  
18 Updates to the secondary metabolite genome mining pipeline. *Nucleic Acids Res*.  
19 2019;47:W81–7.
- 20 128. Navarro-Muñoz JC, Selem-Mojica N, Mullowney MW, Kautsar SA, Tryon JH, Parkinson  
21 EI, et al. A computational framework to explore large-scale biosynthetic diversity. *Nat Chem*  
22 *Biol [Internet]*. 2020;16:60–8. Available from: <http://dx.doi.org/10.1038/s41589-019-0400-9>
- 23 129. Virtanen P, Gommers R, Oliphant TE, Haberland M, Reddy T, Cournapeau D, et al.



- 1    SciPy 1.0: fundamental algorithms for scientific computing in Python. *Nat Methods*.  
2    2020;17:261–72.
- 3    130. Capella-Gutiérrez S, Silla-Martínez JM, Gabaldón T. trimAl: A tool for automated  
4    alignment trimming in large-scale phylogenetic analyses. *Bioinformatics*. 2009;25:1972–3.
- 5    131. Gilchrist CLM, Chooi Y-H. Clinker & Clustermap.js: Automatic Generation of Gene  
6    Cluster Comparison Figures. *Bioinformatics*. 2021;
- 7    132. Kieft K, Zhou Z, Anantharaman K. VIBRANT: Automated recovery, annotation and  
8    curation of microbial viruses, and evaluation of viral community function from genomic  
9    sequences. *Microbiome*. *Microbiome*; 2020;8:1–23.
- 10    133. Nayfach S, Camargo AP, Schulz F, Eloë-Fadrosch E, Roux S, Kyrpides NC. CheckV  
11    assesses the quality and completeness of metagenome-assembled viral genomes. *Nat*  
12    *Biotechnol*. 2020;
- 13

## 1 **Table 1**

2 The top 15 families with the highest average total abundance of processes associated with  
 3 P turnover. Families that were significantly enriched among the AVSs that were shared  
 4 between the two plants are indicated in bold text. The values under each sample type  
 5 represent the average total RPKG of processes associated with phosphorus turnover. The  
 6 rightmost column indicates the phylogenetic gain (PG) of each family. RX = root (external).

| Family                      | Phylum                  | <i>V. epidendroides</i> |              | <i>B. macrantha</i> |              | All samples  | Family PG (%) |
|-----------------------------|-------------------------|-------------------------|--------------|---------------------|--------------|--------------|---------------|
|                             |                         | Soil                    | RX           | Rock                | RX           |              |               |
| Undetermined                | Undetermined            | 27.52                   | 32.25        | 27.39               | 28.79        | 28.99        | N/A           |
| <b>Xanthobacteraceae</b>    | <b>Proteobacteria</b>   | <b>8.15</b>             | <b>11.40</b> | <b>13.84</b>        | <b>15.39</b> | <b>12.20</b> | <b>16.23</b>  |
| <b>Bryobacteraceae</b>      | <b>Acidobacteriota</b>  | <b>2.54</b>             | <b>3.03</b>  | <b>6.30</b>         | <b>7.83</b>  | <b>4.92</b>  | <b>32.15</b>  |
| <b>UBA5184</b>              | <b>Eremiobacterota</b>  | <b>5.92</b>             | <b>6.31</b>  | <b>3.64</b>         | <b>3.23</b>  | <b>4.77</b>  | <b>47.05</b>  |
| Acetobacteraceae            | Proteobacteria          | 3.53                    | 4.50         | 3.12                | 6.30         | 4.36         | 18.00         |
| <b>Solirubrobacteraceae</b> | <b>Actinobacteriota</b> | <b>0.83</b>             | <b>2.01</b>  | <b>6.60</b>         | <b>6.39</b>  | <b>3.96</b>  | <b>34.32</b>  |
| <b>Burkholderiaceae</b>     | <b>Proteobacteria</b>   | <b>3.77</b>             | <b>7.47</b>  | <b>1.71</b>         | <b>2.00</b>  | <b>3.74</b>  | <b>2.01</b>   |
| <b>Beijerinckiaceae</b>     | <b>Proteobacteria</b>   | <b>2.93</b>             | <b>3.42</b>  | <b>3.36</b>         | <b>4.20</b>  | <b>3.48</b>  | <b>13.14</b>  |
| Reyraneliaceae              | Proteobacteria          | 2.60                    | 2.28         | 1.45                | 0.88         | 1.80         | 34.50         |
| <b>Streptosporangiaceae</b> | <b>Actinobacteriota</b> | <b>1.23</b>             | <b>1.12</b>  | <b>1.94</b>         | <b>1.84</b>  | <b>1.53</b>  | <b>6.43</b>   |
| <b>Steroidobacteraceae</b>  | <b>Proteobacteria</b>   | <b>1.99</b>             | <b>1.66</b>  | <b>1.14</b>         | <b>1.28</b>  | <b>1.52</b>  | <b>24.15</b>  |
| <b>Acidobacteriaceae</b>    | <b>Acidobacteriota</b>  | <b>2.23</b>             | <b>2.18</b>  | <b>0.71</b>         | <b>0.79</b>  | <b>1.48</b>  | <b>3.46</b>   |
| <b>Sphingomonadaceae</b>    | <b>Proteobacteria</b>   | <b>0.31</b>             | <b>0.73</b>  | <b>2.13</b>         | <b>2.52</b>  | <b>1.42</b>  | <b>2.94</b>   |
| URHD0088                    | Proteobacteria          | 1.50                    | 1.65         | 0.93                | 1.26         | 1.33         | 91.35         |
| <b>Mycobacteriaceae</b>     | <b>Actinobacteriota</b> | <b>1.19</b>             | <b>1.16</b>  | <b>1.00</b>         | <b>1.66</b>  | <b>1.25</b>  | <b>2.16</b>   |
| <b>Caulobacteraceae</b>     | <b>Proteobacteria</b>   | <b>0.87</b>             | <b>1.61</b>  | <b>1.20</b>         | <b>1.17</b>  | <b>1.21</b>  | <b>6.50</b>   |

7

## 1 **Figure 1**

2 **(A)** Sampling was conducted in the *campos rupestres* grasslands ecoregion (left). *Vellozia*  
3 *epidendroides* (center) specimens were collected in patches of shallow soil. *Barbacenia*  
4 *macrantha* (right) was found in a rocky area, where it grows over exposed rocks. **(B)**  
5 Community composition inferred from 16S ASVs at the phylum level. Samples were grouped  
6 according to their environment. Bar heights are proportional to the relative abundance of the  
7 phylum. Low abundance phyla (relative abundance < 2%) were grouped under the “Other”  
8 category. **(C)** Maximum-likelihood phylogenetic tree of the bacterial MAGs presented in this  
9 study, rooted at the Patescibacteria clade. The innermost ring indicates the phylum  
10 associated with each node. The center ring shows the genomic GC content. The outermost  
11 ring represents the scaled means of log-transformed relative genomic coverages across the  
12 four environments. **(D)** Weighted average community identity (WACI) computed from 16S  
13 ASV data. The blue and green dashed lines represent the median intra-rank 16S identity at  
14 the genus and family levels, respectively. **(E)** Phylogenetic gain (PG) contributed by the  
15 MAGs to different taxa at the phylum, class, and order levels. Only taxa with PG higher than  
16 the following cut-offs are shown: 5% at the phylum level, 30% at the class level, and 40% at  
17 the order level. RX = root (external), RN = root (internal), SX = stem (external), SN = stem  
18 (internal), LX = leaf (external), LN = leaf (internal).

19

## 1 **Figure 2**

2 **(A)** Multidimensional scaling of the Bray-Curtis dissimilarities computed from 16S ASV  
3 abundance data. Samples are colored according to their associated plant species, and  
4 shape indicates whether they were from below ground (substrate and root) or above ground  
5 (stem and leaves) environments. The  $p$ -values of the groupings were obtained from  
6 PERMANOVA tests. **(B)** Bar plots representing the fraction of *V. epidendroides*-exclusive,  
7 shared, and *B. macrantha*-exclusive 16S ASVs across all sample types. The absolute  
8 numbers of ASVs within each group are shown. **(C)** Enrichment of bacterial families  
9 (grouped by phyla) in one or the other plant across all environments (circle colors). The  
10 enrichment score in the x-axis was computed using the Kolmogorov–Smirnov test and  
11 represent the deviation from a null model where ASVs from a given family are uniformly  
12 distributed in a list ranked by the ratio between the abundances in each plant. No family was  
13 found to be enriched in the internal leaf communities of either plant. RX = root (external),  
14 RN = root (internal), SX = stem (external), SN = stem (internal), LX = leaf (external), LN = leaf  
15 (internal).

16

1 **Figure 3**

2 **(A)** Proportion of the total number of 16S ASVs (light yellow) and of the ASV abundance  
3 (dark yellow) shared between the communities associated with both plants. **(B)** Bacterial  
4 families (grouped by phyla) enriched within the shared ASV sets. The x-axis shows the false  
5 discovery rate (FDR) obtained from hypergeometric tests. The extent of the enrichment for  
6 each family, represented by the circle areas, was quantified as the ratio between the number  
7 of ASVs in the shared fraction and the number of ASVs observed in both the shared and  
8 exclusive fractions. No family was found to be enriched in the internal leaf communities of  
9 either plant. RX = root (external), RN = root (internal), SX = stem (external), SN = stem  
10 (internal), LX = leaf (external), LN = leaf (internal).

11

1 **Figure 4**

2 Mean total abundance (sum of RPKGs) of the investigated transporter genes in the  
3 substrates (x-axis) and roots (y-axis) of both plants. Circles are colored according to their  
4 assigned substrate class: amino acids (23 substrates) and organic acids (16 substrates).  
5 Horizontal and vertical lines represent the standard error of the mean in the substrates and  
6 roots, respectively.

7

## 1 **Figure 5**

2 **(A)** Root exudates both solubilize phosphorus (P) in the plant substrate and recruit  
3 microorganisms that consume this nutrient. As the recruited microbes can mobilize  
4 phosphorus that would otherwise be unavailable for the plants (in pink), the total  
5 bioaccessible phosphorus concentration increases over the time. **(B)** Mean total  
6 abundances (sum of RPKGs) of proteins and pathways involved in processes linked to  
7 phosphate turnover (transport, mineralization, and solubilization) in the substrate and root-  
8 associate communities. Abundances of multiprotein complexes (*pstABCS*, *phnCDE*,  
9 *ugpABCE*, and *phnGHIJKLM*) were computed by averaging the abundances of their  
10 subunits. Vertical lines represent the standard error of the mean. **(C)** Phylogenetic  
11 regressions of the number of phosphate turnover-related genes. The MAGs retrieved in this  
12 study were compared to GTDB genomes to identify differences in the numbers of gene  
13 copies associated with phosphorus turnover. The color scale indicates the magnitude of the  
14 enrichment (blue) or depletion (red) of each process in the MAGs, and the area of the circles  
15 represent the statistical significance of the regression coefficient. Regression coefficients  
16 with  $p$ -value > 0.05 are omitted. Phylogenetic regressions were performed on the whole set  
17 of bacterial genomes and on the phyla containing at least 5 MAGs. RX = root (external), CR  
18 = *campos rupestres*.

19

## 1 **Figure 6**

2 Structural diversity of siderophore biosynthetic gene clusters (BGCs) identified in the  
3 *campos rupestres* metagenomes. BGC regions containing siderophore clusters were  
4 hierarchically clustered using UPGMA with BiG-SCAPE distances. Groups of highly similar  
5 regions were identified based on their inconsistency coefficient and only the medoids are  
6 shown. Blue labels indicate the BGC regions that belong to the Pseudonocardiaceae-  
7 associated gene cluster clan. Taxonomies are presented at the family and phylum (in  
8 parenthesis) levels, except for two BGC regions whose contigs were assigned to the  
9 Bacteria domain. Heatmaps represent scaled means of log-transformed relative contig  
10 coverages in the four environments. Gene clusters are shown as arrays of genes (arrows)  
11 and their protein domains (colored blocks) centered at the siderophore biosynthesis protein.  
12 BGC regions containing other types of biosynthetic clusters (rightmost column) were  
13 trimmed to display only the loci assigned to the siderophore clusters.

14



## 1 **Figure 7**

2 **(A)** Phyla predicted to be involved in nitrogen-cycling reactions: fixation (black arrow),  
3 nitrification (blue arrows), denitrification (red arrows), and nitrite reduction to ammonia (gray  
4 arrow). Compounds that can be taken up by plants roots are depicted in green. Taxonomic  
5 assignment was performed at the contig level. Phyla that contributed less than 5% of the  
6 detected genes involved in each reaction were grouped under the “Other” category. **(B)** Total  
7 abundances (sum of RPKGs) of reactions involved in nitrogen turnover processes in the  
8 substrate and external root-associated communities. The abundances of multiprotein  
9 complexes (*nifHDK*, *amoABC*, *nxrAB*, *narGHI*, *napAB*, *nasAB*, *norBC*, *nirBD*, and *nrfAH*)  
10 were computed by averaging the abundances of their subunits. Vertical lines represent the  
11 standard error of the mean. RX = root (external). **(C)** Cladogram of maximum-likelihood  
12 phylogenies inferred from a dereplicated set of metagenomic *nifH* orthologs. Branches are  
13 colored according to the major *nifH* group they belong to, and the tree was rooted in the  
14 node between the two groups. The dominant clades are indicated by the outer rings.  
15 Orthologs encoded by MAGs containing at least two *nif* subunits are indicated by greek  
16 letters: ( $\alpha$ ): Verrucomicrobiota, ( $\beta$ ): Enterobacteriaceae, ( $\gamma$  and  $\delta$ ): Isosphaeraceae. **(D)** In  
17 the *V. epidendroides*-associated communities, nitrogen is mostly fixed by endophytic and  
18 free-living *Bradyrhizobium*, and by Isosphaeraceae, which most likely received their *nif*  
19 complex via horizontal gene transfer (HGT). The produced ammonium is then oxidized into  
20 hydroxylamine by methylotrophic Binataceae. This molecule is then released from the cell  
21 and is oxidized into nitrite by Isosphaeraceae. In the *B. macrantha*-associated communities,  
22 nitrogen is likely converted into ammonium by endophytic *Bradyrhizobium*. Ammonia  
23 originated from organic matter decomposition is oxidized into hydroxylamine and,  
24 subsequently, into nitrite by Nitrososphaeraceae. In both plants, the oxidation of nitrite into  
25 nitrate is likely performed by a several taxa.

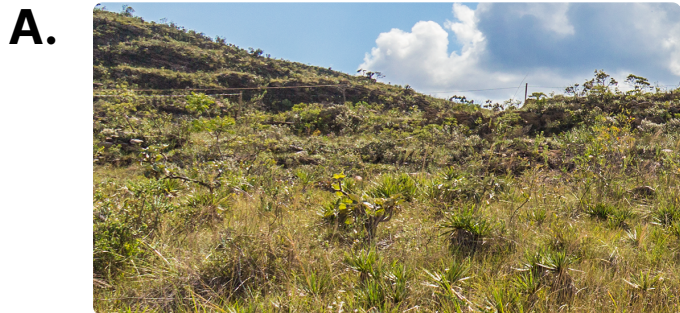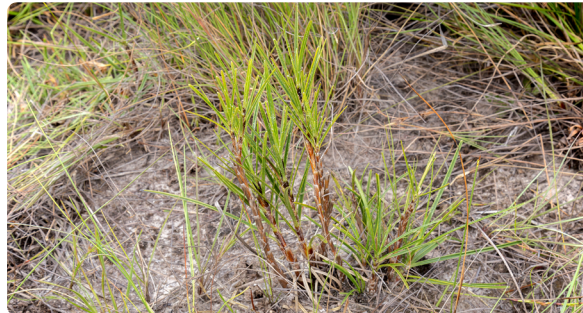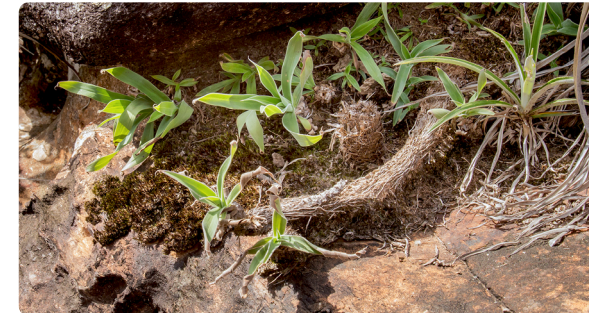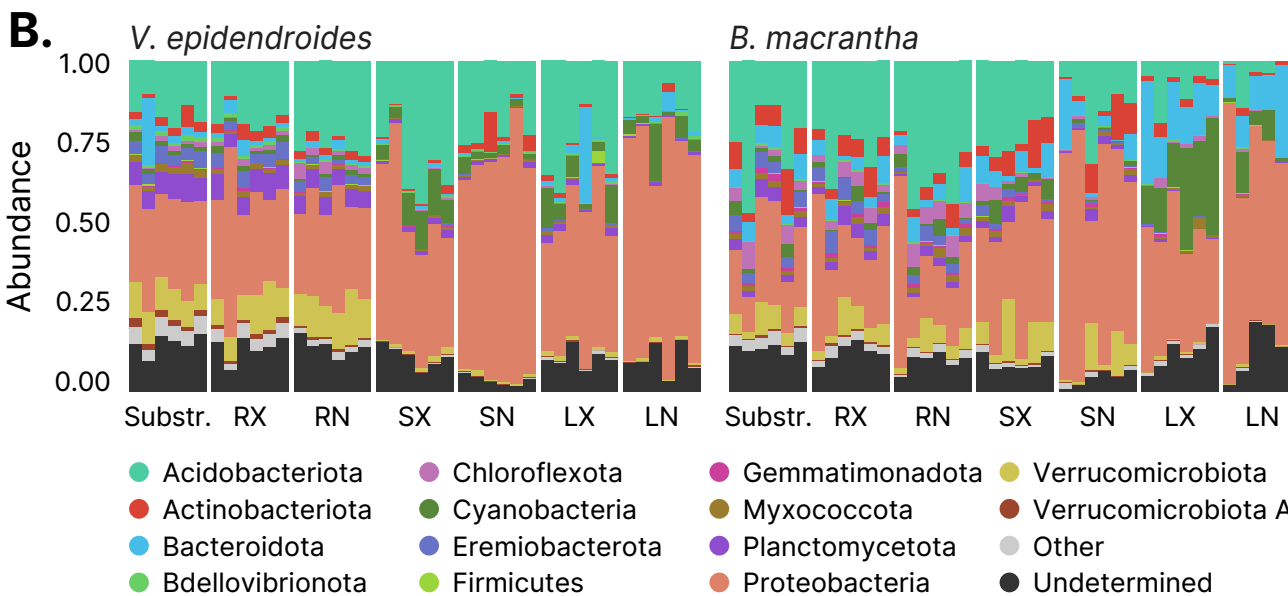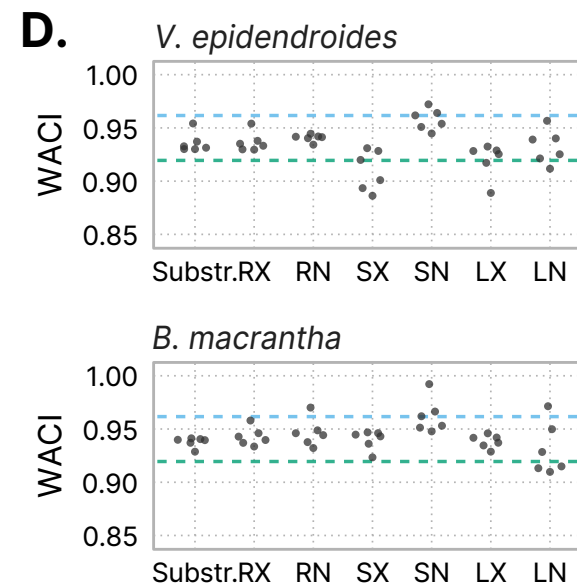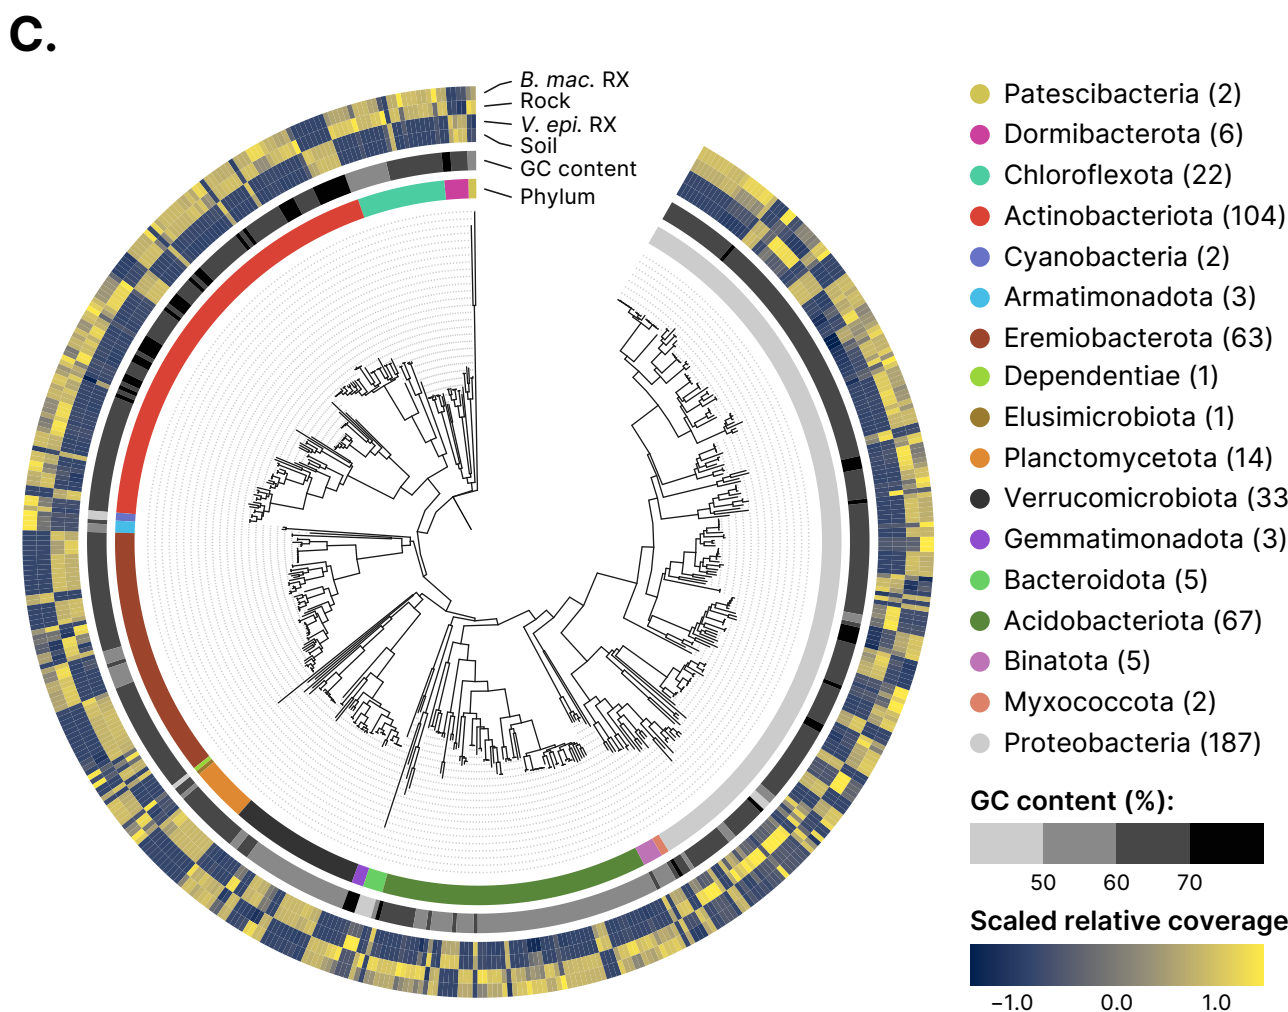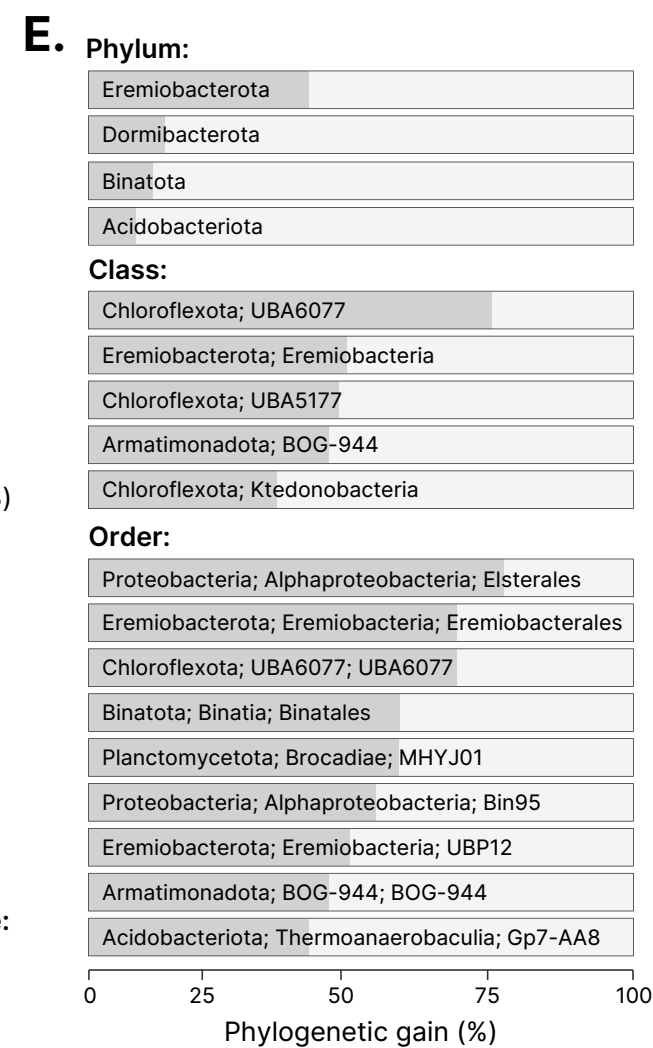

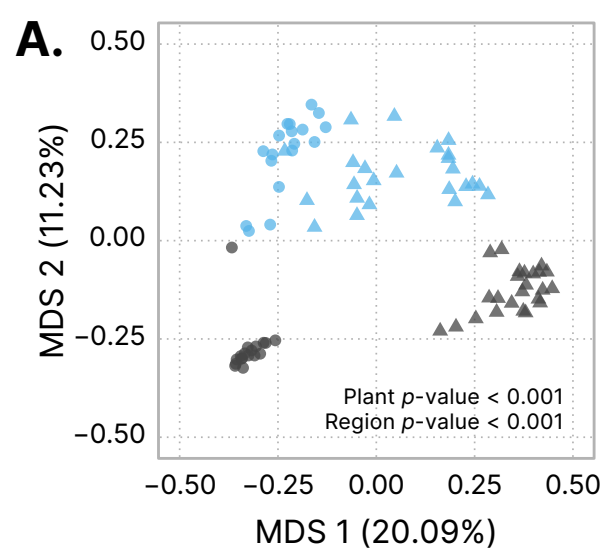

**Plant:**  
 ● *V. epidendroides*  
 ● *B. macrantha*

**Region:**  
 ● Below ground  
 ▲ Above ground

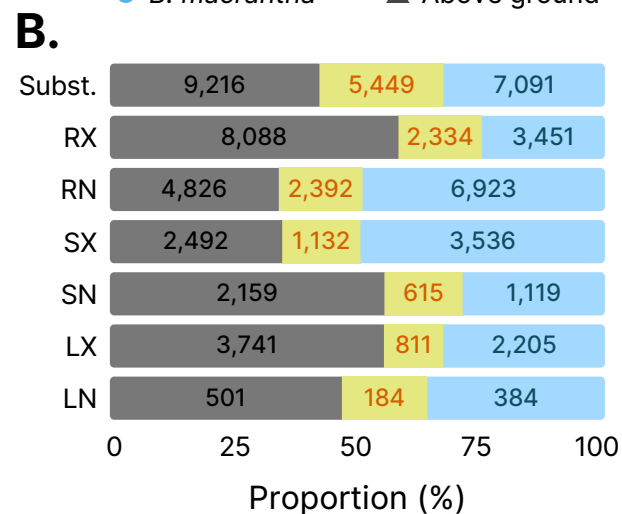

● *V. epidendroides* ● Shared ● *B. macrantha*

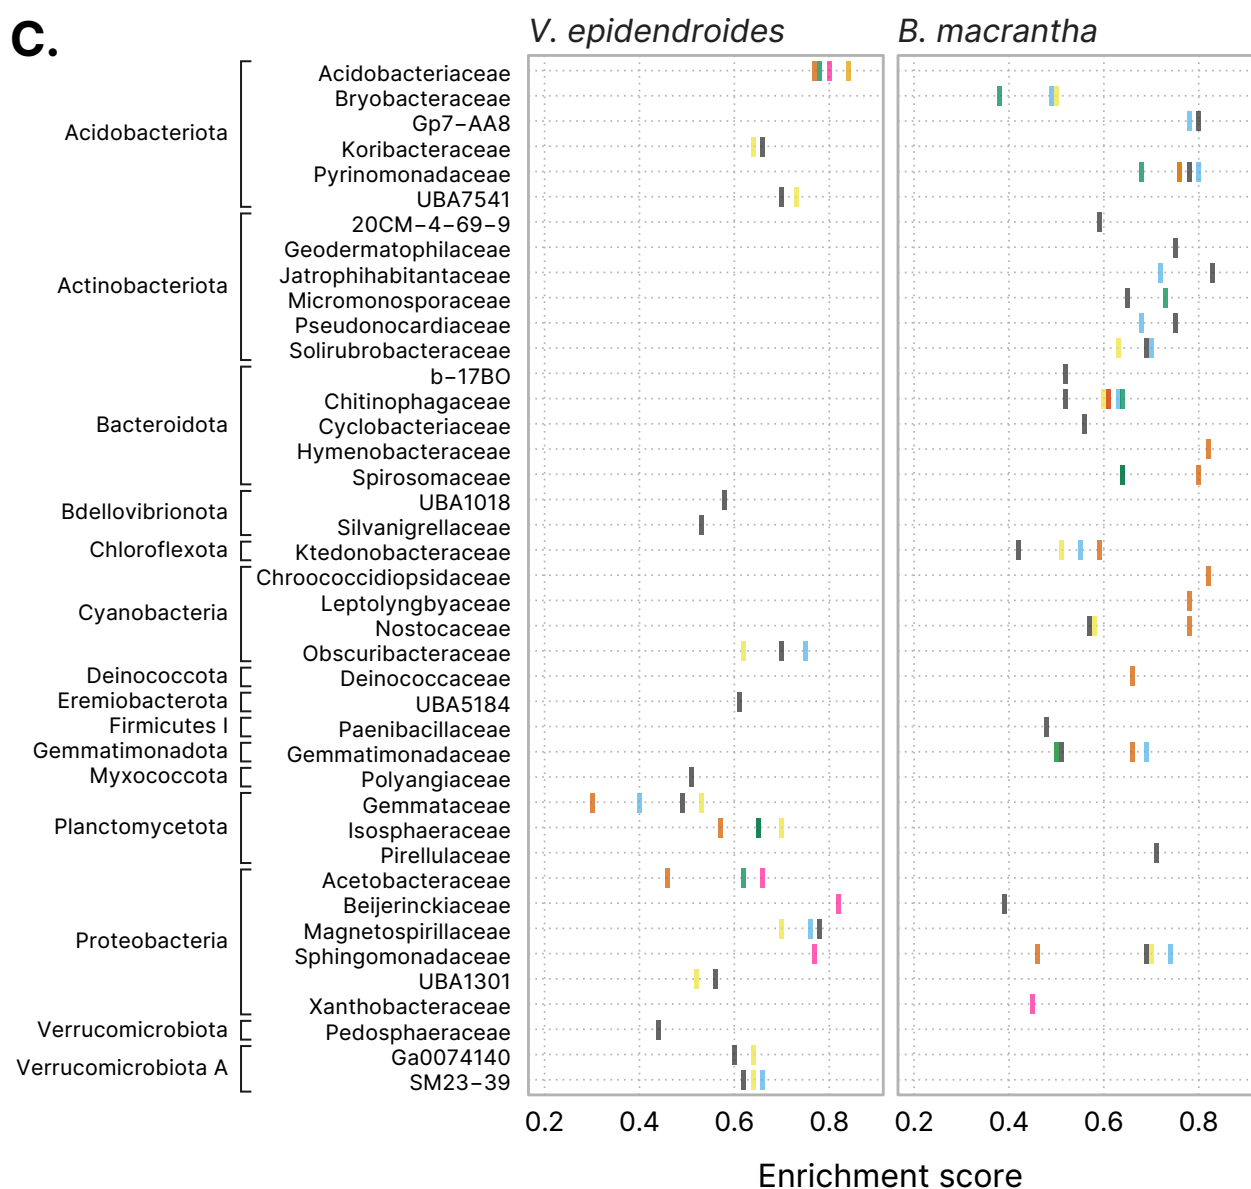

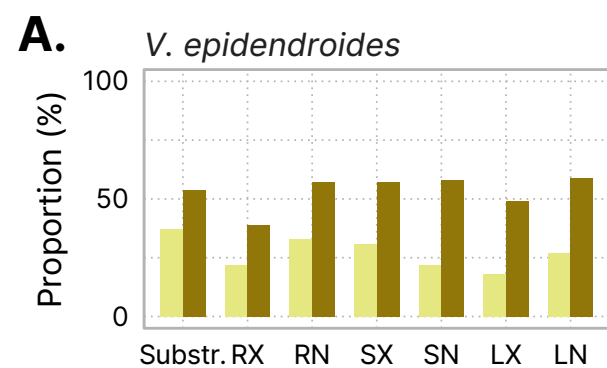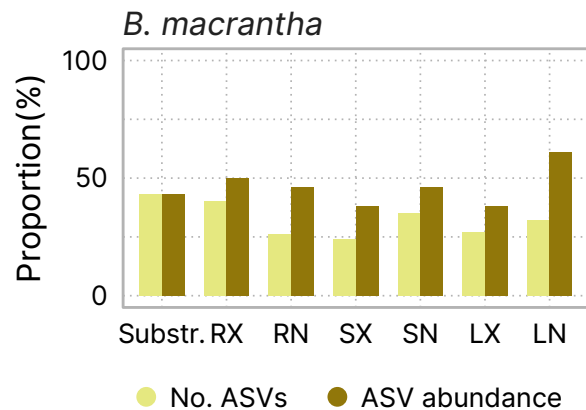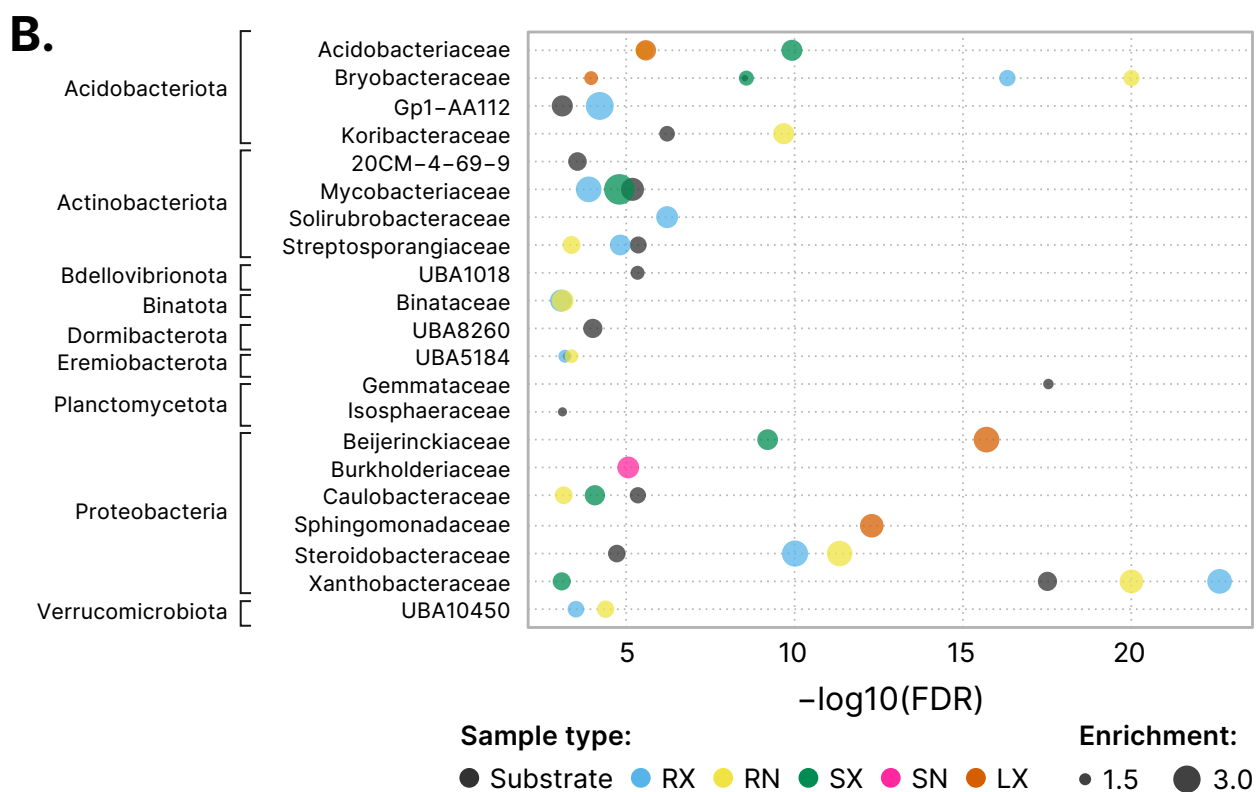

*V. epidendroides*

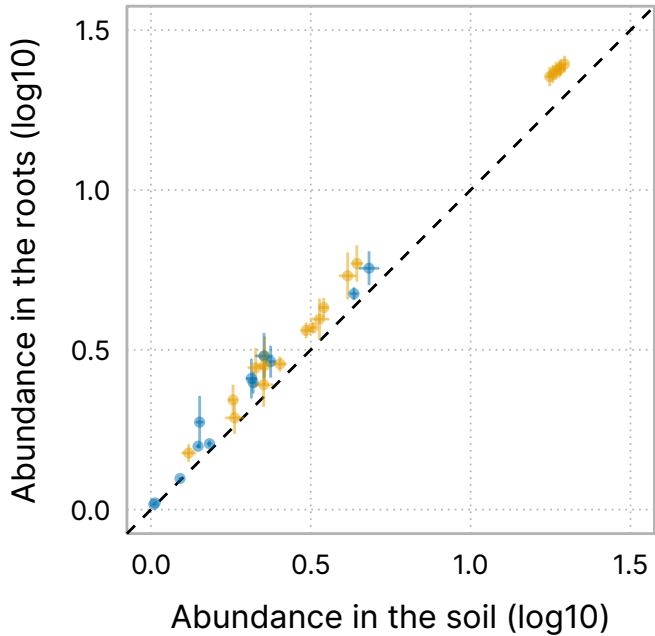

*B. macrantha*

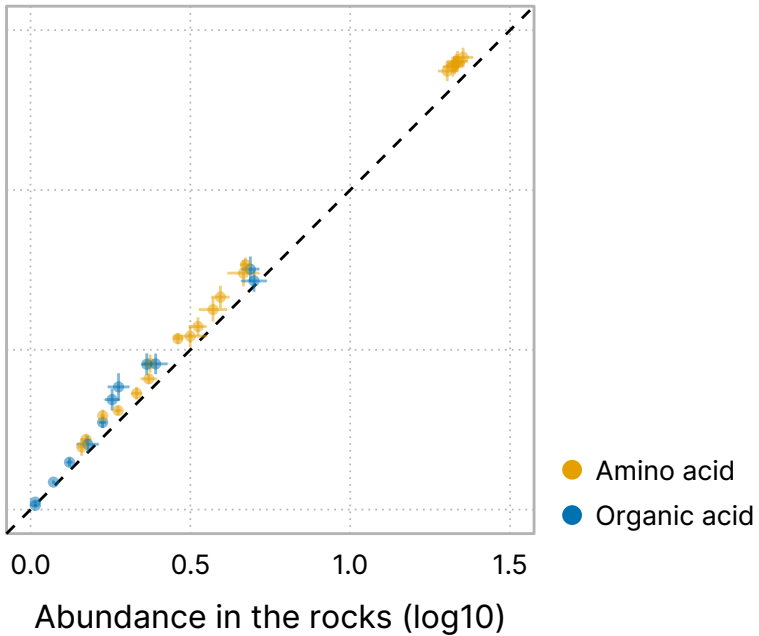



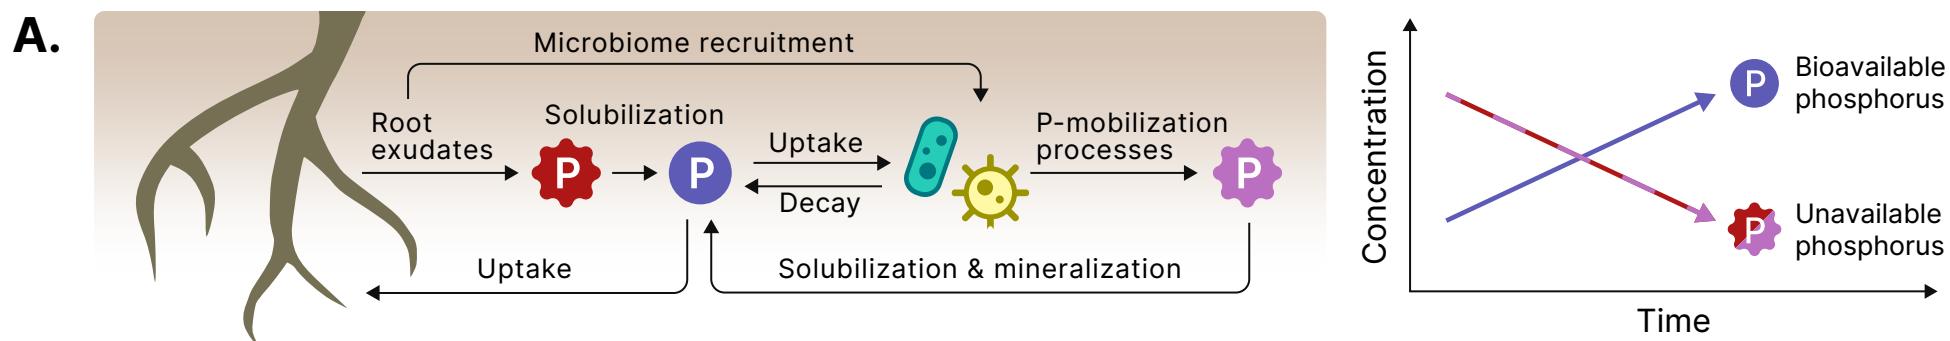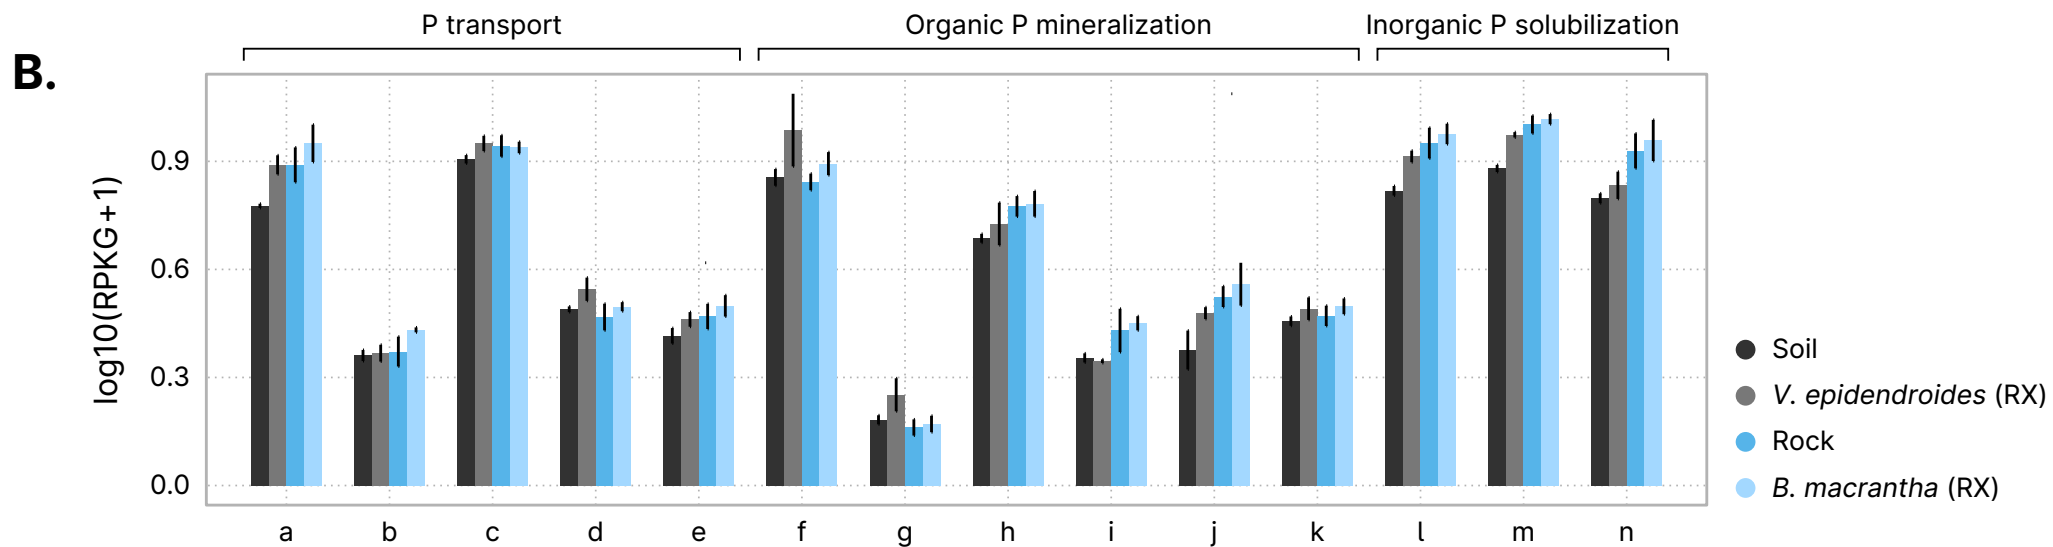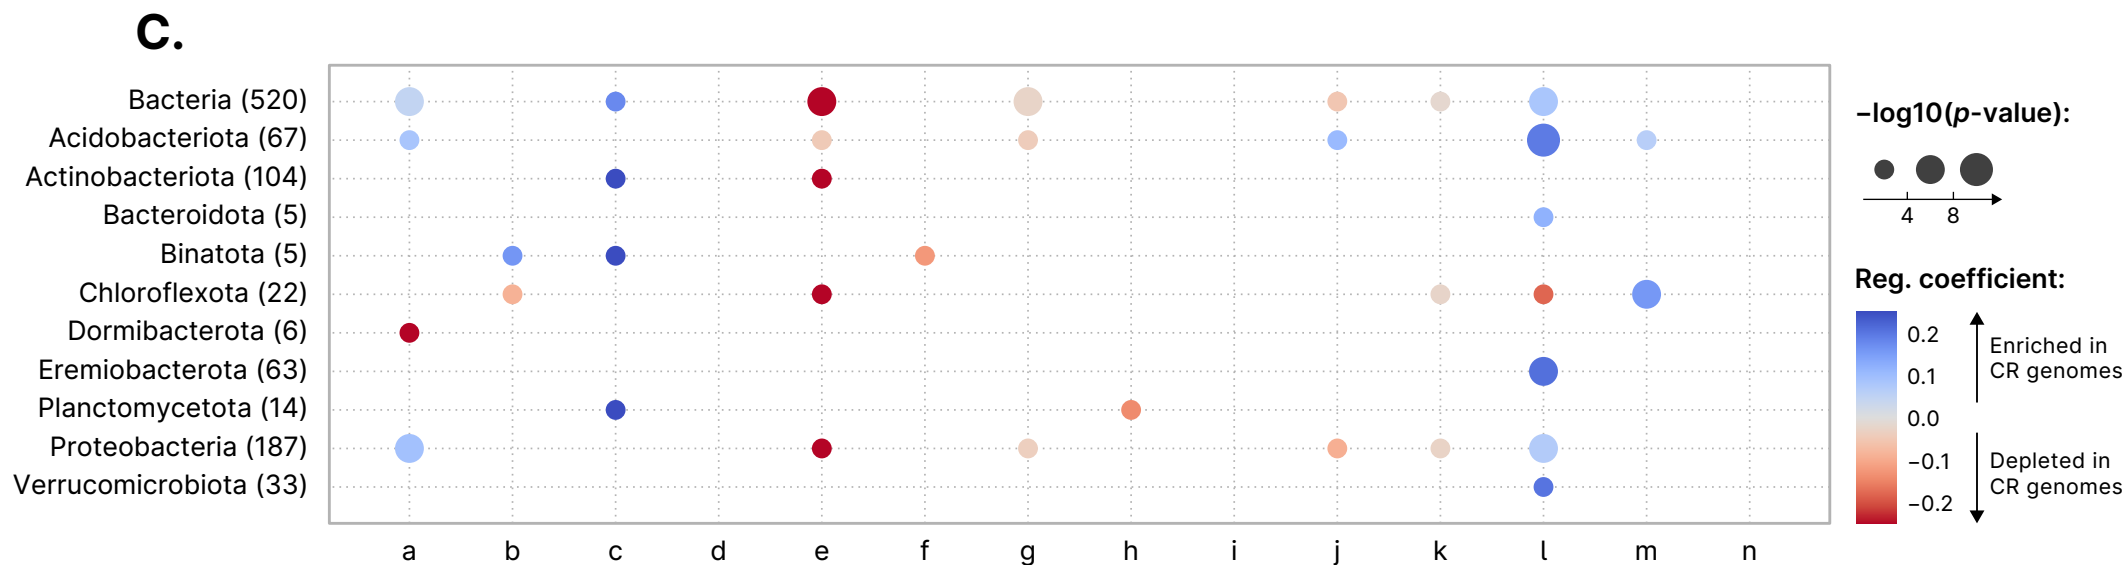

a. Inorganic Phosphate Transporter (PiT) Family  
 b. Phosphate:Na<sup>+</sup> Symporter (PNAS) Family  
 c. ABC phosphate transporter  
 d. ABC phosphonate transporter  
 e. ABC sn-glycerol-3-phosphate transporter

f. Phosphanate catabolism  
 g. Phytase  
 h. sn-glycerol-3-phosphate metabolism  
 i. Phosphotriesterase  
 j. Alkaline phosphatase

k. Acid phosphatase  
 l. Inorganic pyrophosphatase  
 m. Exopolyphosphatase  
 n. Gluconic acid biosynthesis

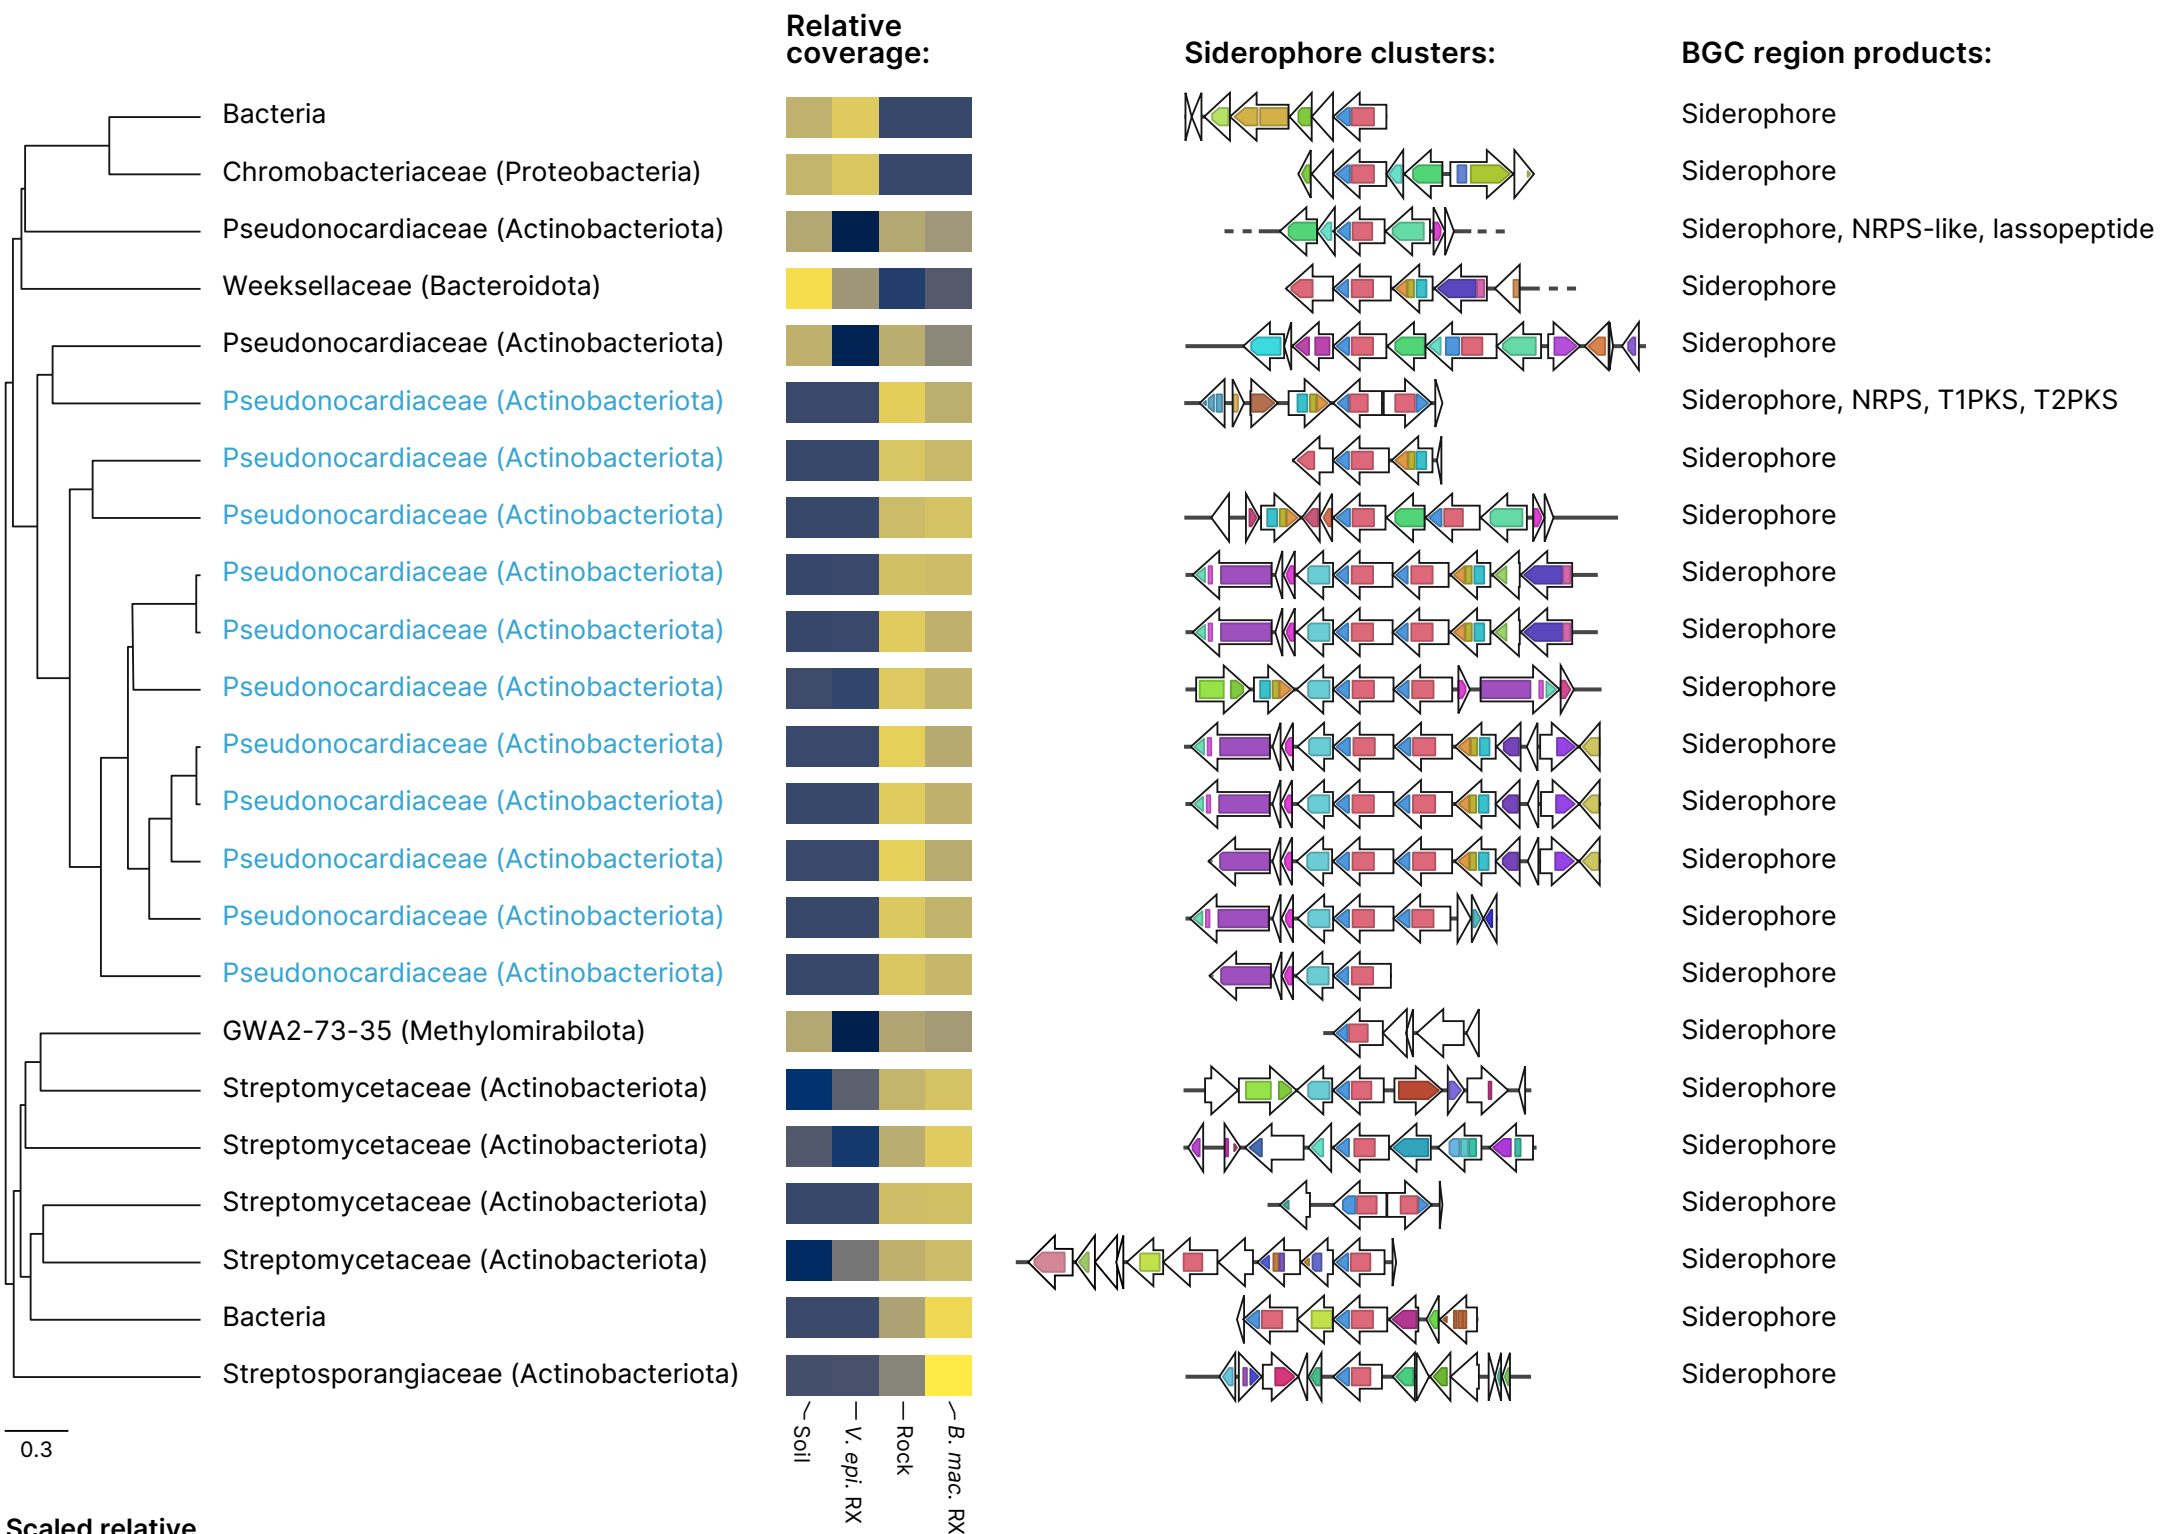

**Scaled relative coverage:**

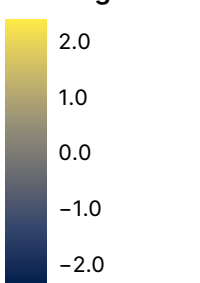

**Recurring proteins and domains:**

- |  |                                       |  |                                          |  |                                            |
|--|---------------------------------------|--|------------------------------------------|--|--------------------------------------------|
|  | Siderophore biosynthesis protein      |  | Pyridoxal-dependent decarboxylase        |  | Pyridoxal-dependent decarboxylase          |
|  | Acetyltransferase                     |  | Periplasmic binding protein              |  | L-lysine-6-monooxygenase                   |
|  | ABC transporter                       |  | FecCD transport family (ABC transporter) |  | MFS transporter                            |
|  | YibE/F transporter family             |  | Aspartate tRNA-ligase                    |  | Alanine tRNA-ligase                        |
|  | GDSL-like Lipase/Acylhydrolase family |  | Metallo-beta-lactamase protein           |  | Replication-assoc. recombination protein A |

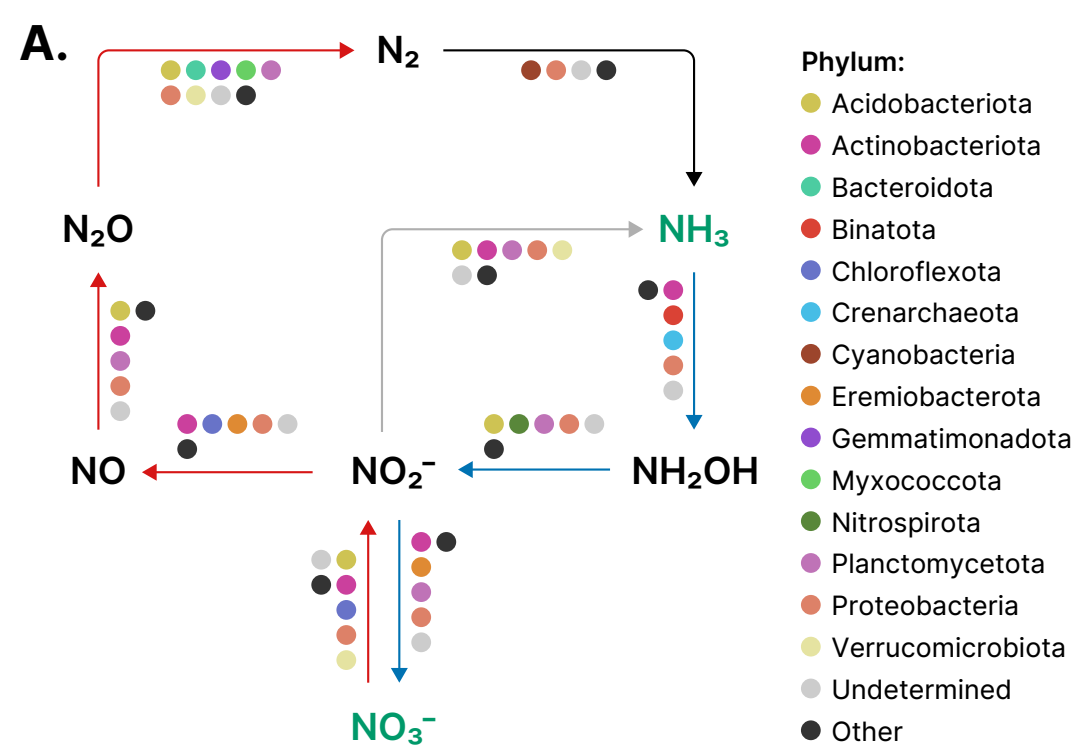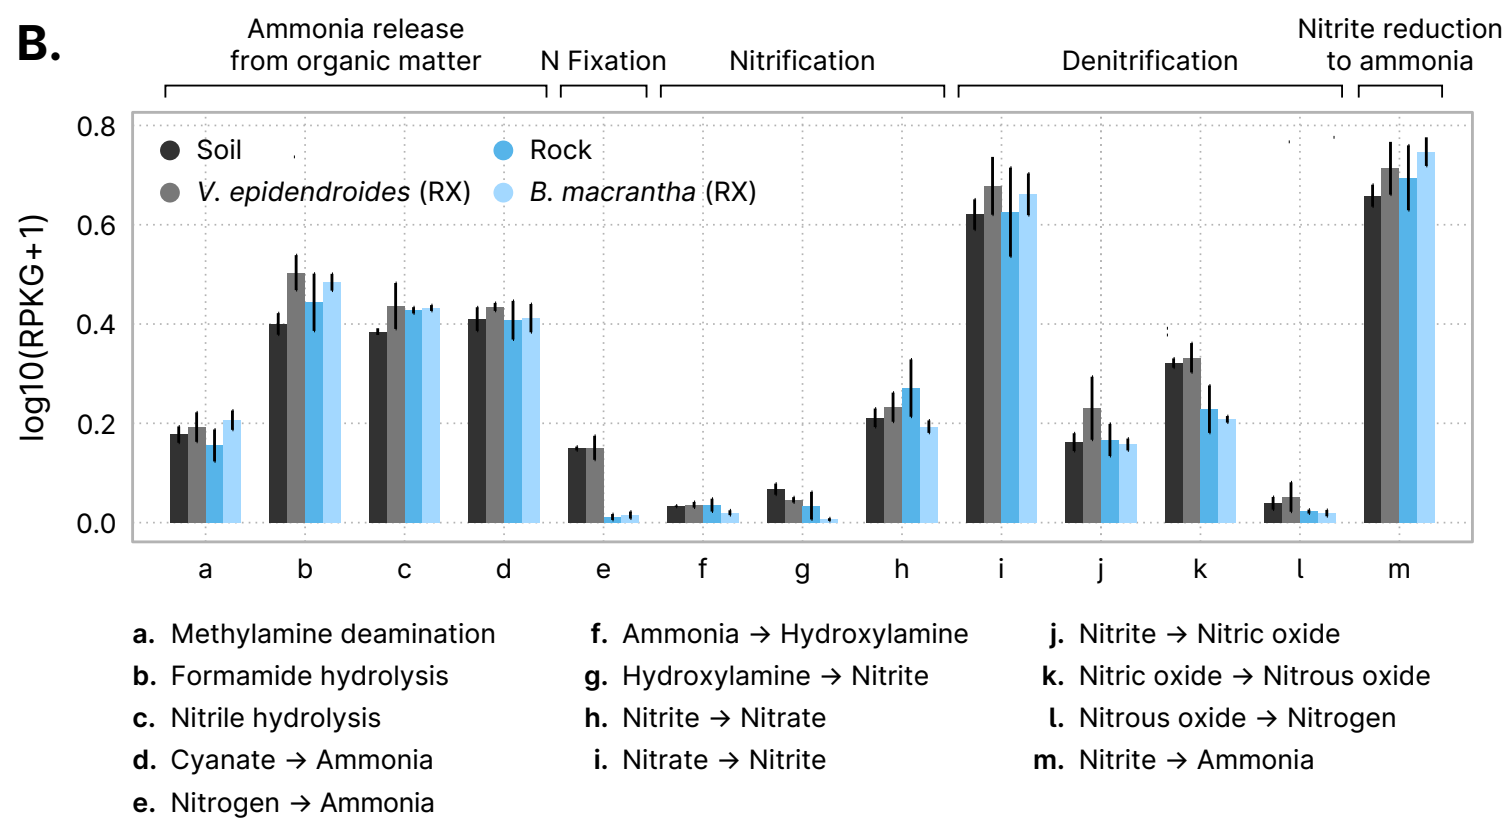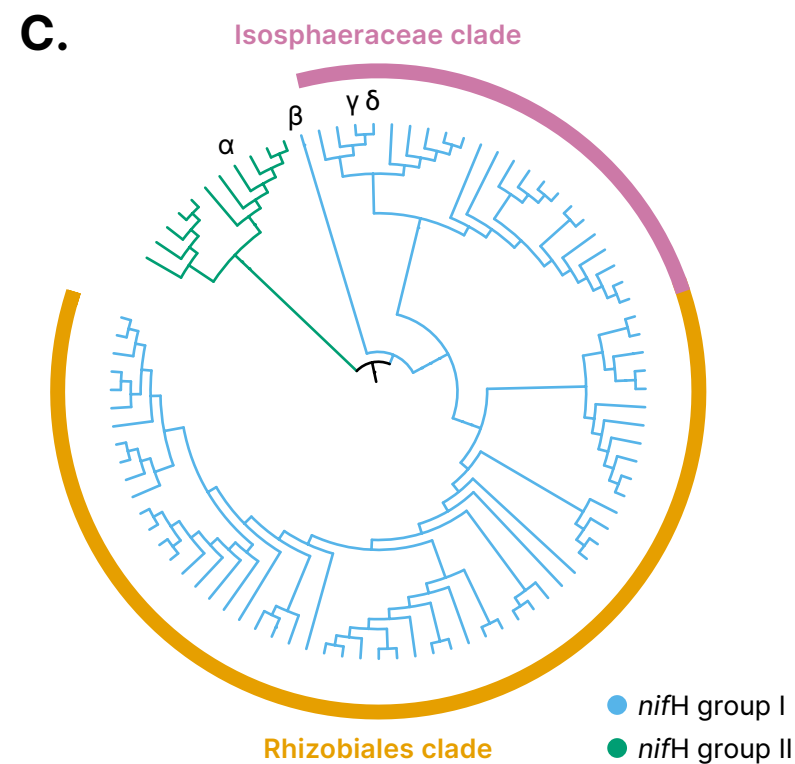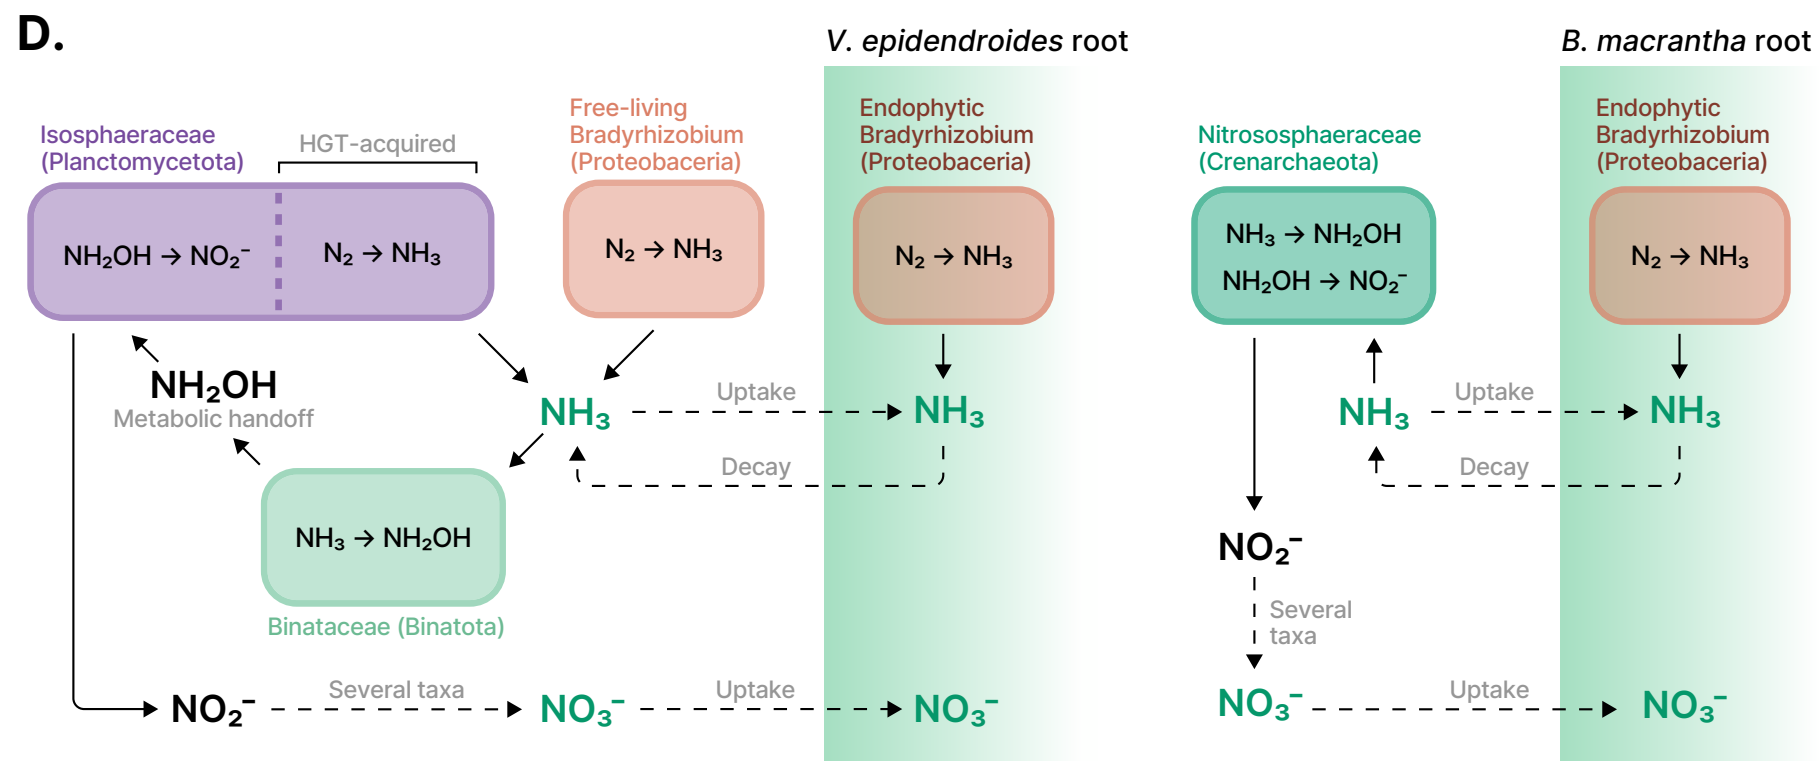

Source: https://www.biorxiv.org/content/10.1101/2021.07.30.454538v1.full.pdf
